# Supplementary material for: Block copolymer synthesis in ionic liquid via polymerisation-induced self-assembly: a convenient route to gel electrolytes
Source: Chem Sci. 2024 Feb 13;15(12):4416–26. doi: 10.1039/d3sc06717c (PMC10952082; doi:10.1039/d3sc06717c)
Supplement: SC-015-D3SC06717C-s001 [file SC-015-D3SC06717C-s001.pdf]

# Supporting Information for:

## Block copolymer synthesis in ionic liquid via polymerisation-induced self-assembly: A convenient route to gel electrolytes

*Georgia L. Maitland,<sup>a</sup> Mingyu Liu,<sup>a</sup> Thomas J. Neal,<sup>b</sup> James Hammerton,<sup>a</sup> Yisong Han,<sup>c</sup> Stephen D. Worrall,<sup>a</sup> Paul D. Topham,<sup>a</sup> and Matthew J. Derry<sup>a,\*</sup>*

### Contents

|                                                                             |    |
|-----------------------------------------------------------------------------|----|
| Determination of HEMA monomer conversion in PHEMA macro-CTA synthesis ..... | 2  |
| Determination of PHEMA macro-CTA degree of polymerisation .....             | 3  |
| Determination of BzMA monomer conversion in PISA syntheses .....            | 4  |
| Summary of block copolymer characterisation .....                           | 5  |
| Additional dynamic light scattering data .....                              | 7  |
| Additional transmission electron microscopy images .....                    | 7  |
| Small-angle X-ray scattering .....                                          | 8  |
| Additional oscillatory rheology data .....                                  | 26 |
| Thermogravimetric analysis .....                                            | 41 |

## Determination of HEMA monomer conversion in PHEMA macro-CTA synthesis

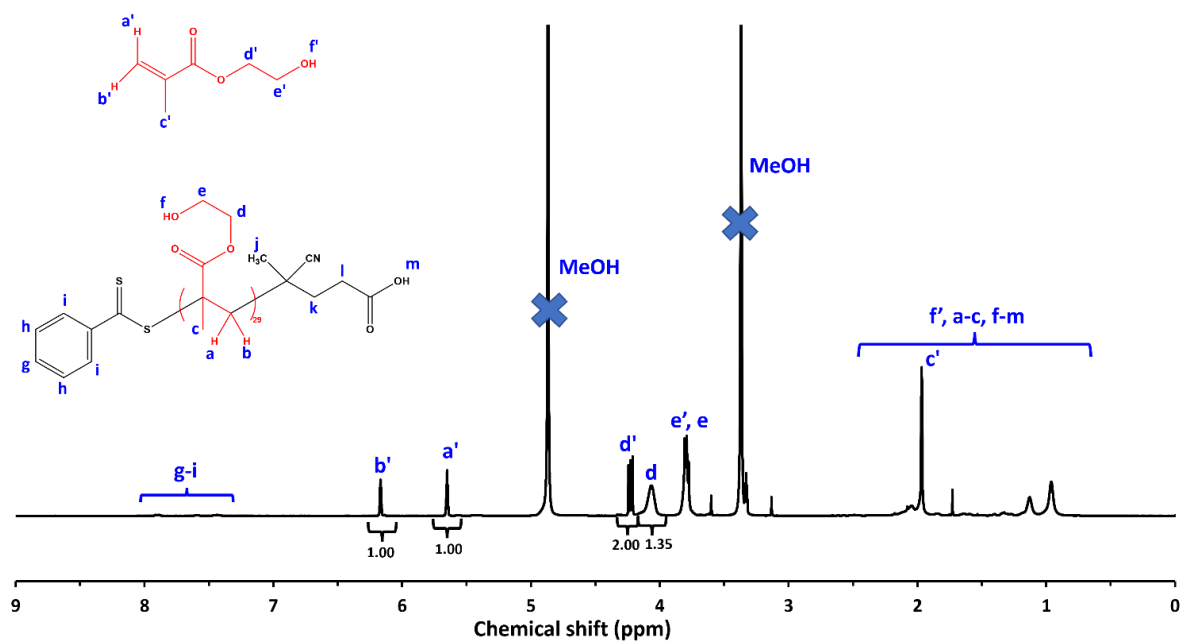

**Figure S1.**  $^1\text{H}$  NMR spectrum of crude PHEMA macro-CTA in  $\text{MeOH-d}_4$ .

$$I_m = [\text{Integral}(d'')] = 2H$$

$$I_p = [\text{Integral}(d)]$$

$$\% \text{ Conversion} = \frac{I_p}{I_m + I_p} \times 100\% = \frac{1.35}{2.00 + 1.35} \times 100\% = 40\%$$

## Determination of PHEMA macro-CTA degree of polymerisation

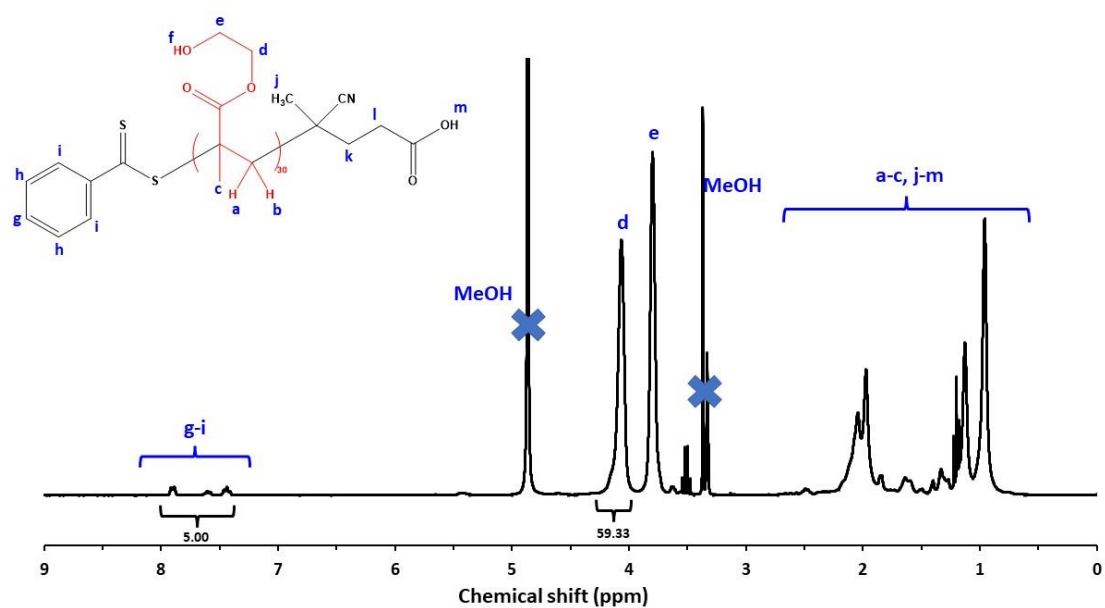

**Figure S2.** <sup>1</sup>H NMR spectrum of purified PHEMA<sub>30</sub> macro-CTA in MeOH-d<sub>4</sub>.

$$[Integral (g-i)] = 5H$$

$$PHEMA DP = \frac{[Integral (d)]}{2} = \frac{59.33}{2} = 30$$

## Determination of BzMA monomer conversion in PISA syntheses

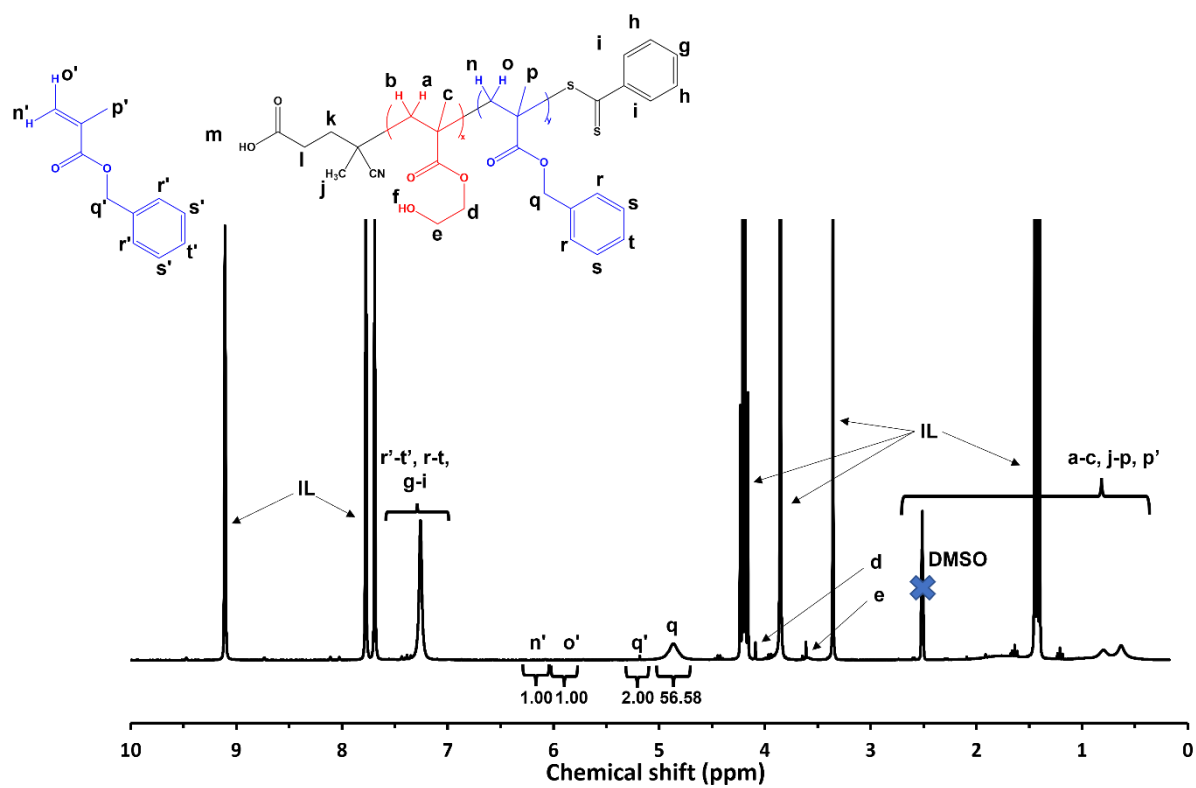

**Figure S3.** Representative  $^1\text{H}$  NMR spectrum of crude  $\text{PHEMA}_{30}\text{-}b\text{-PBzMA}_y$  in  $\text{DMSO-d}_6$ .

Example calculation:

$$I_m = [\text{Integral}(d')] = 2H$$

$$I_p = [\text{Integral}(d)]$$

$$\% \text{ Conversion} = \frac{I_p}{I_m + I_p} \times 100\% = \frac{56.58}{2.00 + 56.58} \times 100\% = \mathbf{97\%}$$

## Summary of block copolymer characterisation

**Table S1.** Summary of targeted copolymer composition, BzMA conversion, actual copolymer composition, theoretical  $M_n$ , GPC  $M_n$  and  $M_w/M_n$ , and DLS diameter and PDI for the series of PHEMA<sub>30</sub>-*b*-PBzMA<sub>y</sub> diblock copolymers prepared by RAFT dispersion polymerisation of BzMA in [EMIM][DCA] at 70 °C and 15% w/w, using AIBN initiator ([PHEMA<sub>30</sub> macro-CTA]/[AIBN] molar ratio = 5.0). PHPMA<sub>30</sub>-*b*-PBzMA<sub>y</sub> is denoted as H<sub>30</sub>-B<sub>y</sub> for brevity.

| Target composition                | BzMA conversion (%) | <sup>1</sup> H NMR spectroscopy   |                                   | DMF GPC                      |           | DLS           |      |
|-----------------------------------|---------------------|-----------------------------------|-----------------------------------|------------------------------|-----------|---------------|------|
|                                   |                     | Actual composition                | $M_{n,th}$ (g mol <sup>-1</sup> ) | $M_n$ (g mol <sup>-1</sup> ) | $M_w/M_n$ | Diameter (nm) | PDI  |
| H <sub>30</sub>                   | -                   | H <sub>30</sub>                   | 4,184                             | 8,000                        | 1.24      | -             | -    |
| H <sub>30</sub> -B <sub>50</sub>  | 97                  | H <sub>30</sub> -B <sub>49</sub>  | 12,688                            | 18,100                       | 1.24      | -             | -    |
| H <sub>30</sub> -B <sub>100</sub> | 98                  | H <sub>30</sub> -B <sub>98</sub>  | 21,322                            | 24,900                       | 1.21      | 39            | 0.98 |
| H <sub>30</sub> -B <sub>150</sub> | 97                  | H <sub>30</sub> -B <sub>146</sub> | 29,780                            | 24,000                       | 1.20      | 47            | 0.85 |
| H <sub>30</sub> -B <sub>200</sub> | 98                  | H <sub>30</sub> -B <sub>196</sub> | 38,591                            | 42,500                       | 1.24      | 90            | 0.32 |
| H <sub>30</sub> -B <sub>210</sub> | 98                  | H <sub>30</sub> -B <sub>201</sub> | 40,353                            | 40,600                       | 1.21      | 137           | 1.00 |
| H <sub>30</sub> -B <sub>220</sub> | 98                  | H <sub>30</sub> -B <sub>216</sub> | 42,115                            | 40,000                       | 1.34      | 100           | 0.67 |
| H <sub>30</sub> -B <sub>230</sub> | 99                  | H <sub>30</sub> -B <sub>228</sub> | 44,230                            | 41,400                       | 1.39      | 134           | 0.57 |
| H <sub>30</sub> -B <sub>240</sub> | 97                  | H <sub>30</sub> -B <sub>233</sub> | 45,111                            | 45,500                       | 1.30      | 88            | 0.84 |
| H <sub>30</sub> -B <sub>250</sub> | 97                  | H <sub>30</sub> -B <sub>240</sub> | 46,873                            | 47,800                       | 1.23      | 153           | 0.14 |
| H <sub>30</sub> -B <sub>260</sub> | 96                  | H <sub>30</sub> -B <sub>250</sub> | 48,107                            | 46,700                       | 1.30      | 129           | 0.04 |
| H <sub>30</sub> -B <sub>270</sub> | 98                  | H <sub>30</sub> -B <sub>262</sub> | 50,750                            | 50,700                       | 1.34      | 210           | 0.24 |
| H <sub>30</sub> -B <sub>280</sub> | 96                  | H <sub>30</sub> -B <sub>269</sub> | 51,455                            | 53,100                       | 1.26      | 221           | 0.11 |
| H <sub>30</sub> -B <sub>290</sub> | 96                  | H <sub>30</sub> -B <sub>279</sub> | 53,217                            | 48,700                       | 1.43      | 134           | 0.13 |
| H <sub>30</sub> -B <sub>300</sub> | 97                  | H <sub>30</sub> -B <sub>291</sub> | 55,331                            | 52,900                       | 1.31      | 238           | 0.06 |
| H <sub>30</sub> -B <sub>310</sub> | 98                  | H <sub>30</sub> -B <sub>301</sub> | 57,093                            | 56,800                       | 1.33      | 31            | 0.60 |
| H <sub>30</sub> -B <sub>320</sub> | 98                  | H <sub>30</sub> -B <sub>314</sub> | 59,384                            | 57,000                       | 1.29      | 146           | 0.28 |
| H <sub>30</sub> -B <sub>330</sub> | 96                  | H <sub>30</sub> -B <sub>317</sub> | 59,913                            | 60,200                       | 1.34      | 145           | 0.47 |
| H <sub>30</sub> -B <sub>340</sub> | 97                  | H <sub>30</sub> -B <sub>330</sub> | 62,203                            | 57,500                       | 1.36      | 245           | 0.07 |
| H <sub>30</sub> -B <sub>350</sub> | 97                  | H <sub>30</sub> -B <sub>340</sub> | 63,966                            | 57,300                       | 1.49      | 356           | 0.07 |
| H <sub>30</sub> -B <sub>400</sub> | 99                  | H <sub>30</sub> -B <sub>396</sub> | 73,833                            | 66,700                       | 1.43      | 272           | 0.08 |
| H <sub>30</sub> -B <sub>450</sub> | 99                  | H <sub>30</sub> -B <sub>446</sub> | 82,644                            | 67,200                       | 1.53      | 273           | 0.08 |
| H <sub>30</sub> -B <sub>500</sub> | 98                  | H <sub>30</sub> -B <sub>490</sub> | 90,397                            | 79,900                       | 1.56      | 692           | 0.58 |

**Table S2.** Summary of targeted copolymer composition, BzMA conversion, actual copolymer composition, theoretical  $M_n$ , GPC  $M_n$  and  $M_w/M_n$ , and DLS diameter and PDI for targeted PHEMA<sub>30</sub>-*b*-PBzMA<sub>300</sub> diblock copolymers prepared by RAFT dispersion polymerisation of BzMA in [EMIM][DCA] at 70 °C and various copolymer concentrations, using AIBN initiator ([PHEMA<sub>30</sub> macro-CTA]/[AIBN] molar ratio = 5.0). PHPMA<sub>30</sub>-*b*-PBzMA<sub>y</sub> is denoted as H<sub>30</sub>-B<sub>y</sub> for brevity.

| Copolymer concentration (% w/w) | BzMA conversion (%) | <sup>1</sup> H NMR spectroscopy   |                                   | DMF GPC                      |           | DLS           |      |
|---------------------------------|---------------------|-----------------------------------|-----------------------------------|------------------------------|-----------|---------------|------|
|                                 |                     | Actual composition                | $M_{n,th}$ (g mol <sup>-1</sup> ) | $M_n$ (g mol <sup>-1</sup> ) | $M_w/M_n$ | Diameter (nm) | PDI  |
| 15                              | 97                  | H <sub>30</sub> -B <sub>291</sub> | 55,331                            | 52,900                       | 1.31      | 238           | 0.06 |
| 10                              | 90                  | H <sub>30</sub> -B <sub>270</sub> | 51,761                            | 53,200                       | 1.36      | 500           | 0.36 |
| 9                               | 94                  | H <sub>30</sub> -B <sub>282</sub> | 53,875                            | 56,100                       | 1.43      | 324           | 0.27 |
| 8                               | 89                  | H <sub>30</sub> -B <sub>267</sub> | 51,232                            | 53,100                       | 1.32      | 361           | 0.30 |
| 7                               | 89                  | H <sub>30</sub> -B <sub>267</sub> | 51,232                            | 50,200                       | 1.47      | 317           | 0.41 |
| 6                               | 98                  | H <sub>30</sub> -B <sub>294</sub> | 55,990                            | 53,200                       | 2.12      | 200           | 0.28 |
| 5                               | 97                  | H <sub>30</sub> -B <sub>291</sub> | 55,461                            | 69,500                       | 1.67      | 770           | 0.76 |
| 4                               | 98                  | H <sub>30</sub> -B <sub>294</sub> | 55,990                            | 53,600                       | 1.94      | -             | -    |
| 3                               | 92                  | H <sub>30</sub> -B <sub>276</sub> | 52,818                            | 63,000                       | 1.39      | -             | -    |
| 2                               | 99                  | H <sub>30</sub> -B <sub>297</sub> | 56,518                            | 43,600                       | 1.67      | -             | -    |
| 1                               | 95                  | H <sub>30</sub> -B <sub>285</sub> | 54,404                            | 33,500                       | 1.49      | -             | -    |

## Additional dynamic light scattering data

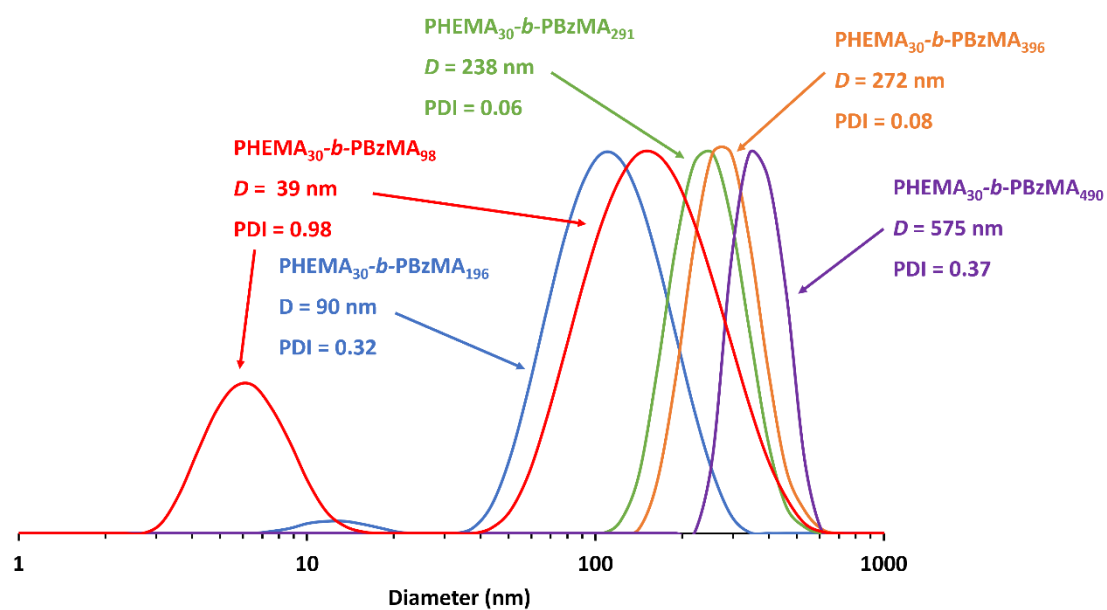

**Figure S4.** DLS traces obtained of selected 0.15% w/w dispersions block copolymer series.

## Additional transmission electron microscopy images

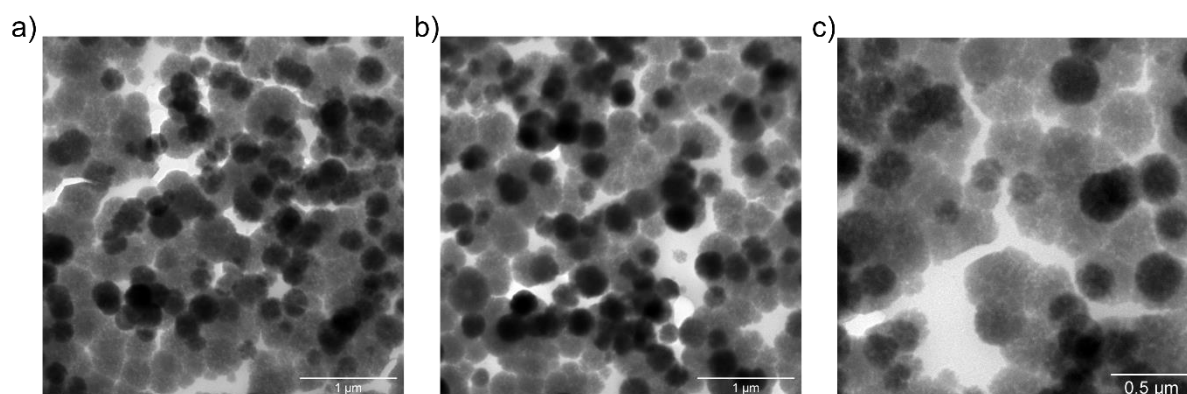

**Figure S5.** TEM images obtained for a 15% w/w dispersion of PHEMA<sub>30</sub>-*b*-PBzMA<sub>146</sub>.

## Small-angle X-ray scattering

Programming tools within the Irena SAS Igor Pro macros<sup>1</sup> were used to implement the scattering models.

In general, the intensity of X-rays scattered by a dispersion of nano-objects [as represented by the scattering cross-section per unit sample volume,  $\frac{d\Sigma}{d\Omega}(q)$ ] can be expressed as:

$$\frac{d\Sigma}{d\Omega}(q) = NS(q) \int_0^\infty \dots \int_0^\infty F(q, r_1, \dots, r_k)^2 \Psi(r_1, \dots, r_k) dr_1, \dots, dr_k \quad (S1)$$

where  $F(q, r_1, \dots, r_k)$  is the form factor,  $r_1, \dots, r_k$  is a set of  $k$  parameters describing the structural morphology,  $\Psi(r_1, \dots, r_k)$  is the distribution function,  $S(q)$  is the structure factor and  $N$  is the number density of nano-objects per unit volume expressed as:

$$N = \frac{\varphi}{\int_0^\infty \dots \int_0^\infty V(r_1, \dots, r_k) \Psi(r_1, \dots, r_k) dr_1, \dots, dr_k} \quad (S2)$$

where  $V(r_1, \dots, r_k)$  is the volume of the nano-object and  $\varphi$  is its volume fraction within the dispersion. It is assumed that  $S(q) = 1$  at the sufficiently low copolymer concentrations used in this study (1.0% w/w).

## Spherical micelle model

The spherical micelle form factor for Equation S1 is given by<sup>2</sup>

$$F_{s_{mic}}(q) = N_s^2 \beta_s^2 A_s^2(q, R_s) + N_s \beta_c^2 F_c(q, R_g) + N_s(N_s - 1) \beta_c^2 A_c^2(q) + 2N_s^2 \beta_s \beta_c A_s(q, R_s) A_c(q) \quad (S3)$$

where  $R_s$  is the volume-average sphere core radius and  $R_g$  is the radius of gyration of the coronal steric stabilizer block (in this case, PHEMA<sub>30</sub>). The X-ray scattering length contrasts for the core and corona blocks are given by  $\beta_s = V_s(\xi_s - \xi_{sol})$  and  $\beta_c = V_c(\xi_c - \xi_{sol})$  respectively. Here,  $\xi_s$ ,  $\xi_c$  and  $\xi_{sol}$  are the X-ray scattering length densities of the core block ( $\xi_{PBzMA} = 10.41 \times 10^{10} \text{ cm}^{-2}$ ), corona block ( $\xi_{PHEMA} = 11.50 \times 10^{10} \text{ cm}^{-2}$ ) and [EMIM][DCA] solvent ( $\xi_{sol} = 9.90 \times 10^{10} \text{ cm}^{-2}$ ), respectively.  $V_s$  and  $V_c$  are the volumes of the core block ( $V_{PBzMA}$ ) and the corona block ( $V_{PHEMA}$ ), respectively. The sphere form factor amplitude is used for the amplitude of the core self-term:

$$A_c(q, R_s) = \Phi(qR_s) \exp\left(-\frac{q^2 \sigma^2}{2}\right) \quad (S4)$$

where  $\Phi(qR_s) = \frac{3[\sin(qR_s) - qR_s \cos(qR_s)]}{(qR_s)^3}$ . A sigmoidal interface between the two blocks was assumed for the spherical micelle form factor (Equation S3). This is described by the exponent term with a width  $\sigma$  accounting for a decaying scattering length density at the micellar interface. This  $\sigma$  value was fixed at 2.5 during fitting.

The form factor amplitude of the spherical micelle corona is:

$$A_c(q) = \frac{\int_{R_s}^{R_s+2s} \mu_c(r) \frac{\sin(qr)}{qr} r^2 dr}{\int_{R_s}^{R_s+2s} \mu_c(r) r^2 dr} \exp\left(-\frac{q^2 \sigma^2}{2}\right) \quad (S5)$$

The radial profile,  $\mu_c(r)$ , can be expressed by a linear combination of two cubic b splines, with two fitting parameters  $s$  and  $a$  corresponding to the width of the profile and the weight coefficient respectively. This information can be found elsewhere,<sup>3, 4</sup> as can the approximate integrated form of Equation S5. The self-correlation term for the coronal block is given by the Debye function:

$$F_c(q, R_g) = \frac{2[\exp(-q^2 R_g^2) - 1 + q^2 R_g^2]}{q^4 R_g^4} \quad (S6)$$

where  $R_g$  is the radius of gyration of the PHEMA coronal block. In all cases  $R_g$  was fixed to be 1.4 nm, which is estimated by assuming the total contour length of PHMEA<sub>30</sub> is 7.66 nm ( $30 \times 0.255$  nm, where 0.225 nm is the contour length of one HEMA monomer unit with two C-C bonds in all-trans conformation). Given a mean Kuhn length of 1.53 nm, based on the known literature value for poly(methyl methacrylate)<sup>5</sup>, an estimated unperturbed  $R_g$  of 1.4 nm is determined using  $R_g = (7.66 \times 1.53/6)^{0.5}$ .

The aggregation number,  $N_s$ , of the spherical micelle is given by:

$$N_s = (1 - x_{sol}) \frac{\frac{4}{3}\pi R_s^3}{V_s} \quad (S7)$$

where  $x_{sol}$  is the volume fraction of solvent within the PBzMA micelle cores, which was found to be zero in all cases. A polydispersity for one parameter ( $R_s$ ) is assumed for the micelle model, which is described by a Gaussian distribution. Thus, the polydispersity function in Equation S1 can be represented as:

$$\Psi(r_1) = \frac{1}{\sqrt{2\pi\sigma_{Rs}^2}} \exp\left(-\frac{(r_1 - R_s)^2}{2\sigma_{Rs}^2}\right) \quad (S8)$$

where  $\sigma_{Rs}$  is the standard deviation for  $R_s$ . In accordance with Equation S2, the number density per unit volume for the micelle model is expressed as:

$$N = \frac{\varphi}{\int_0^\infty V(r_1)\Psi(r_1)dr_1} \quad (S9)$$

where  $\varphi$  is the total volume fraction of copolymer in the spherical micelles and  $V(r_1)$  is the total volume of copolymer within a spherical micelle [ $V(r_1) = (V_s + V_c)N_s(r_1)$ ].

### ***Worm-like micelle model***

The worm-like micelle form factor for Equation S1 is given by:

$$F_{w\_mic}(q) = N_w^2 \beta_s^2 F_{sw}(q) + N_w \beta_c^2 F_c(q, R_g) + N_w(N_w - 1) \beta_c^2 S_{cc}(q) + 2N_w^2 \beta_s \beta_c S_{sc}(q) \quad (S10)$$

where all the parameters are the same as those described in the spherical micelle model (Equation S3), unless stated otherwise.

The self-correlation term for the worm core cross-sectional volume-average radius  $R_w$  is:

$$F_{sw}(q) = F_{worm}(q, L_w, b_w) A_{CS_{worm}}^2(q, R_w) \quad (S11)$$

where

$$A_{CS_{worm}}^2(q, R_w) = \left[ 2 \frac{J_1(qR_w)}{qR_w} \right]^2 \quad (S12)$$

and  $J_1$  is the first-order Bessel function of the first kind, and a form factor  $F_{worm}(q, L_w, b_w)$  for self-avoiding semi-flexible chains represents the worm-like micelles, where  $b_w$  is the Kuhn length and  $L_w$  is the mean contour length. A complete expression for the chain form factor can be found elsewhere.<sup>6</sup>

The mean aggregation number of the worm-like micelle,  $N_w$ , is given by:

$$N_w = (1 - x_{sol}) \frac{\pi R_w^2 L_w}{V_s} \quad (S13)$$

where  $x_{sol}$  is the volume fraction of solvent within the worm-like micelle cores, which was found to be zero in all cases. The possible presence of semi-spherical caps at both ends of each worm is neglected in this form factor.

A polydispersity for one parameter ( $R_w$ ) is assumed for the micelle model, which is described by a Gaussian distribution. Thus, the polydispersity function in Equation S1 can be represented as:

$$\Psi(r_1) = \frac{1}{\sqrt{2\pi\sigma_{R_w}^2}} \exp\left(-\frac{(r_1 - R_w)^2}{2\sigma_{R_w}^2}\right) \quad (S14)$$

where  $\sigma_{R_w}$  is the standard deviation for  $R_w$ . In accordance with Equation S2, the number density per unit volume for the worm-like micelle model is expressed as:

$$N = \frac{\varphi}{\int_0^\infty V(r_1) \Psi(r_1) dr_1} \quad (S15)$$

where  $\varphi$  is the total volume fraction of copolymer in the worm-like micelles and  $V(r_1)$  is the total volume of copolymer in a worm-like micelle [ $V(r_1) = (V_s + V_c)N_w(r_1)$ ].

### ***Vesicle model***

The vesicle form factor in Equation S1 is expressed as:<sup>7</sup>

$$F_{ves}(q) = N_v^2 \beta_m^2 A_m^2(q) + N_v \beta_{vc}^2 F_c(q, R_g) + N_v (N_v - 1) \beta_{vc}^2 A_{vc}^2(q) + 2N_v^2 \beta_m \beta_{vc} A_m(q) A_{vc}(q) \quad (S16)$$

where all the parameters are the same as in the spherical micelle model (see Equation S3) unless stated otherwise.

The amplitude of the membrane self-term is:

$$A_m(q) = \frac{V_{out} \varphi(q R_{out}) - V_{in} \varphi(q R_{in})}{V_{out} - V_{in}} \exp\left(-\frac{q^2 \sigma_{in}^2}{2}\right) \quad (S17)$$

where  $R_{in} = R_m - \frac{1}{2}T_m$  is the inner radius of the membrane,  $R_{out} = R_m + \frac{1}{2}T_m$  is the outer radius of the membrane ( $R_m$  is the radius from the centre of the vesicle to the centre of the membrane),  $V_{in} = \frac{4}{3}\pi R_{in}^3$  and  $V_{out} = \frac{4}{3}\pi R_{out}^3$ . It should be noted that Equation S16 differs subtly from the original work in which it was first described.<sup>7</sup> The exponent term in Equation S17 represents a sigmoidal interface between the blocks, with a width  $\sigma_{in}$  accounting for a decaying scattering length density at the membrane surface. The value of  $\sigma_{in}$  was fixed at 2.5 during fitting. The mean vesicle aggregation number,  $N_v$ , is given by:

$$N_v = (1 - x_{sol}) \frac{V_{out} - V_{in}}{V_m} \quad (S18)$$

where  $x_{sol}$  is the volume fraction of solvent within the vesicle membrane, which was found to be zero in all cases. Assuming that there is no penetration of the solvophilic coronal blocks into the solvophobic membrane, the amplitude of the vesicle corona self-term is expressed as:

$$A_{vc}(q) = \Psi(qR_g) \frac{1}{2} \left[ \frac{\sin[q(R_{out} + R_g)]}{q(R_{out} + R_g)} + \frac{\sin[q(R_{in} - R_g)]}{q(R_{in} - R_g)} \right] \quad (S19)$$

where the term outside the square brackets is the factor amplitude of the corona block polymer chain such that:

$$\Psi(qR_g) = \frac{1 - \exp(-qR_g)}{(qR_g)^2} \quad (S20)$$

For the vesicle model, it was assumed that two parameters are polydisperse: the radius from the centre of the vesicles to the centre of the membrane and the membrane thickness (denoted  $R_m$  and  $T_m$ , respectively). Each parameter is considered to have a Gaussian distribution of values, so the polydispersity function in Equation S1 can be expressed in each case as:

$$\Psi(r_1 r_2) = \frac{1}{\sqrt{2\pi\sigma_{R_m}^2}} \exp\left(-\frac{(r_1 - R_m)^2}{2\sigma_{R_m}^2}\right) \frac{1}{\sqrt{2\pi\sigma_{T_m}^2}} \exp\left(-\frac{(r_1 - T_m)^2}{2\sigma_{T_m}^2}\right) \quad (S21)$$

where  $\sigma_{R_m}$  and  $\sigma_{T_m}$  are the standard deviations for  $R_m$  and  $T_m$ , respectively. Following Equation S2, the number density per unit volume for the vesicle model is expressed as:

$$N = \frac{\varphi}{\int_0^\infty \int_0^\infty V(r_1, r_2) \Psi(r_1, r_2) dr_1 dr_2} \quad (S22)$$

where  $\varphi$  is the total volume fraction of copolymer in the vesicles and  $V(r_1, r_2)$  is the total volume of copolymers in a vesicle  $[V(r_1, r_2) = (V_m + V_{vc})N_v(r_1, r_2)]$ .

### **Gaussian chain model**

Data for the 1% w/w solution of PHEMA<sub>30</sub>-*b*-PBzMA<sub>49</sub> were fitted to a Gaussian chain model.<sup>8</sup> Generally, the scattering cross-section per unit sample volume for an individual Gaussian polymer chain can be expressed as:

$$\frac{d\Sigma}{d\Omega}(q) = \varphi(\Delta\xi)^2 V_{\text{mol}} F_{\text{mol}}(q) \quad (\text{S23})$$

where  $V_{\text{mol}}$  is the total molecular volume and  $\Delta\xi$  is the excess scattering length density of the copolymer  $[\Delta\xi = \xi_{\text{PHEMA-PBzMA}} - \xi_{[\text{EMIM}][\text{DCA}]} = 0.92 \times 10^{-10} \text{ cm}^{-2}]$ , where the scattering length density of the copolymer,  $\xi_{\text{PHEMA-PBzMA}} = \frac{V_{\text{PHEMA}}\xi_{\text{PHEMA}} + V_{\text{PBzMA}}\xi_{\text{PBzMA}}}{V_{\text{PHEMA-PBzMA}}}$  which for PHEMA<sub>30</sub>-*b*-PBzMA<sub>49</sub> gives  $\xi_{\text{PHEMA-PBzMA}} = 10.72 \times 10^{-10} \text{ cm}^{-2}$ , and the scattering length density of [EMIM][DCA],  $\xi_{[\text{EMIM}][\text{DCA}]} = 9.90 \times 10^{-10} \text{ cm}^{-2}$ . The generalized form factor for a Gaussian polymer chain is given by:

$$F_{\text{mol}}(q) = \left[ \frac{1}{vU^{1/(2v)}} \gamma\left(\frac{1}{2v}, U\right) - \frac{1}{vU^{1/v}} \left(\frac{1}{v}, U\right) \right] \quad (\text{S24})$$

where the lower incomplete gamma function is  $\gamma(s, x) = \int_0^x t^{s-1} \exp(-t) dt$  and  $U$  is the modified variable:

$$U = (2v + 1)(2v + 2) \frac{q^2 R_{\text{g cop}}^2}{6} \quad (\text{S25})$$

Here,  $v$  is the extended volume parameter and  $R_{\text{g cop}}$  is the radius of gyration of the copolymer chain.

**Table S3.** Summary of parameters obtained when fitting SAXS data to appropriate models.  $\phi_{\text{sphere}}$ ,  $\phi_{\text{worm}}$  and  $\phi_{\text{vesicle}}$  are the volume fraction of spheres, worms and vesicles, respectively.  $D_{\text{sphere}}$  is the spherical nanoparticle diameter ( $D_{\text{sphere}} = 2R_s + 4R_g$ , where  $R_g$  is the radius of gyration of the stabiliser block and  $R_s$  is the core radius).  $T_{\text{worm}}$  is the worm thickness ( $T_{\text{worm}} = 2R_w + 4R_g$ , where  $R_w$  is the worm core cross-sectional radius).  $L_{\text{worm}}$  is the worm length.  $D_{\text{vesicle}}$  is the overall vesicle diameter ( $D_{\text{vesicle}} = R_m + T_m + 4R_g$ , where  $R_m$  is the centre of the vesicle to the centre of the membrane and  $T_m$  is the membrane thickness).  $R_{g\text{cop}}$  is the radius of gyration of dissolved copolymer chains.  $v$  is the extended volume parameter. PHEMA<sub>30</sub>-*b*-PBzMA<sub>y</sub> is denoted as H<sub>30</sub>-B<sub>y</sub> for brevity.

|                                   | Spherical micelle model |                          | Worm-like micelle model |                        |                        | Vesicle model           |                           |            | Gaussian chain model   |     |
|-----------------------------------|-------------------------|--------------------------|-------------------------|------------------------|------------------------|-------------------------|---------------------------|------------|------------------------|-----|
| Sample                            | $\phi_{\text{sphere}}$  | $D_{\text{sphere}}$ (nm) | $\phi_{\text{worm}}$    | $T_{\text{worm}}$ (nm) | $L_{\text{worm}}$ (nm) | $\phi_{\text{vesicle}}$ | $D_{\text{vesicle}}$ (nm) | $T_m$ (nm) | $R_{g\text{cop}}$ (nm) | $v$ |
| H <sub>30</sub> -B <sub>49</sub>  |                         |                          |                         |                        |                        |                         |                           |            | 2.90                   | 0.5 |
| H <sub>30</sub> -B <sub>98</sub>  | 0.0141                  | 20.0                     |                         |                        |                        |                         |                           |            |                        |     |
| H <sub>30</sub> -B <sub>146</sub> | 0.0227                  | 20.4                     |                         |                        |                        |                         |                           |            |                        |     |
| H <sub>30</sub> -B <sub>196</sub> | 0.0066                  | 20.7                     | 0.0124                  | 35.6                   | 140                    |                         |                           |            |                        |     |
| H <sub>30</sub> -B <sub>201</sub> | 0.0118                  | 22.7                     | 0.0085                  | 34.5                   | 256                    |                         |                           |            |                        |     |
| H <sub>30</sub> -B <sub>216</sub> | 0.0160                  | 21.1                     | 0.0068                  | 32.2                   | 600                    |                         |                           |            |                        |     |
| H <sub>30</sub> -B <sub>228</sub> | 0.0084                  | 21.3                     | 0.0123                  | 35.4                   | 212                    |                         |                           |            |                        |     |
| H <sub>30</sub> -B <sub>233</sub> | 0.0127                  | 21.9                     | 0.0080                  | 35.1                   | 156                    |                         |                           |            |                        |     |
| H <sub>30</sub> -B <sub>240</sub> | 0.0036                  | 22.3                     | 0.0121                  | 38.7                   | 159                    |                         |                           |            |                        |     |
| H <sub>30</sub> -B <sub>250</sub> |                         |                          | 0.0050                  | 17.4                   | 600                    |                         |                           |            |                        |     |
| H <sub>30</sub> -B <sub>265</sub> | 0.0052                  | 21.3                     | 0.0223                  | 39.0                   | 212                    |                         |                           |            |                        |     |
| H <sub>30</sub> -B <sub>269</sub> | 0.0020                  | 21.5                     | 0.0127                  | 42.8                   | 216                    |                         |                           |            |                        |     |
| H <sub>30</sub> -B <sub>279</sub> | 0.0054                  | 21.4                     | 0.0111                  | 40.3                   | 197                    |                         |                           |            |                        |     |
| H <sub>30</sub> -B <sub>291</sub> | 0.0017                  | 20.7                     | 0.0079                  | 42.7                   | 149                    |                         |                           |            |                        |     |
| H <sub>30</sub> -B <sub>301</sub> | 0.0172                  | 21.6                     | 0.0056                  | 39.2                   | 240                    |                         |                           |            |                        |     |
| H <sub>30</sub> -B <sub>314</sub> |                         |                          | 0.0012                  | 19.6                   | 100                    | 0.0175                  | 409                       | 24.6       |                        |     |
| H <sub>30</sub> -B <sub>317</sub> |                         |                          | 0.0007                  | 17.8                   | 100                    | 0.0174                  | 440                       | 25.1       |                        |     |
| H <sub>30</sub> -B <sub>330</sub> |                         |                          | 0.0040                  | 59.2                   | 100                    | 0.0155                  | 348                       | 25.4       |                        |     |
| H <sub>30</sub> -B <sub>340</sub> |                         |                          | 0.0008                  | 38.1                   | 104                    | 0.0166                  | 311                       | 26.3       |                        |     |
| H <sub>30</sub> -B <sub>396</sub> |                         |                          |                         |                        |                        | 0.0147                  | 315                       | 29.0       |                        |     |
| H <sub>30</sub> -B <sub>446</sub> |                         |                          |                         |                        |                        | 0.0162                  | 302                       | 31.3       |                        |     |
| H <sub>30</sub> -B <sub>490</sub> |                         |                          |                         |                        |                        | 0.0530                  | 307                       | 33.3       |                        |     |

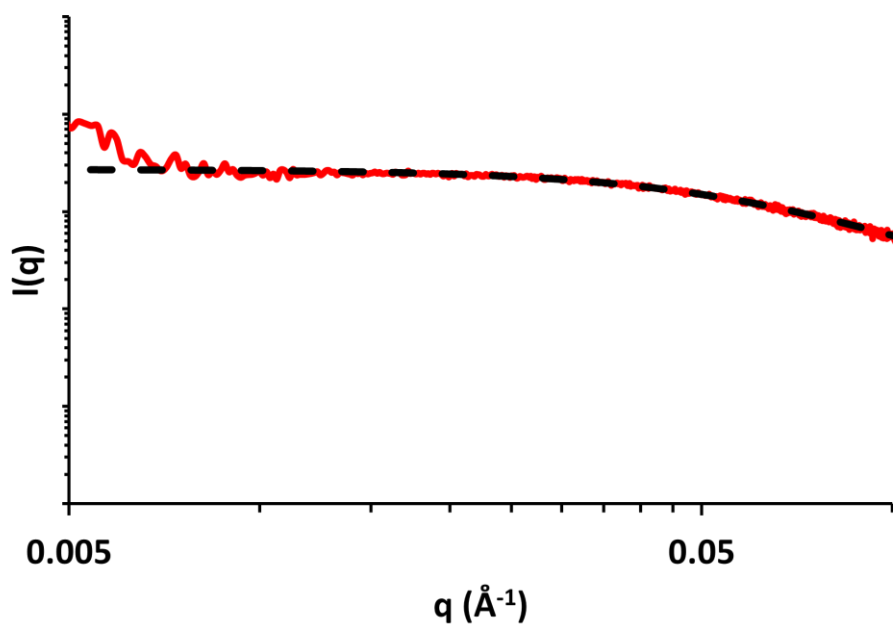

**Figure S6.** Background-subtracted SAXS data obtained for 1.0% w/w PHEMA<sub>30</sub>-PBzMA<sub>49</sub> in [EMIM][DCA] at 25 °C. Dashed lines represent the model fit obtained using the Gaussian chain model.

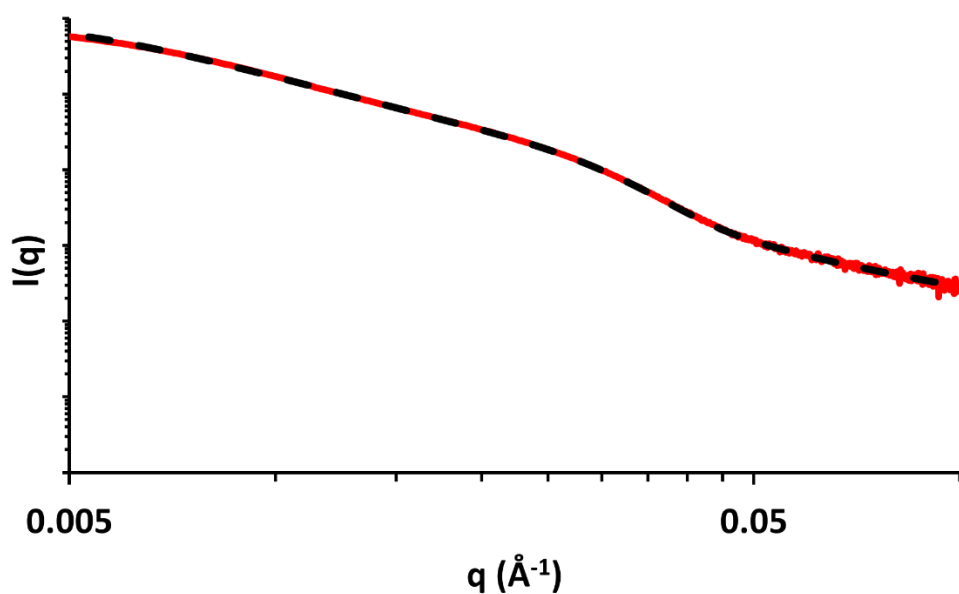

**Figure S7.** Background-subtracted SAXS data obtained for 1.0% w/w PHEMA<sub>30</sub>-PBzMA<sub>98</sub> in [EMIM][DCA] at 25 °C. Dashed lines represent the model fit obtained using the spherical micelle model with an additional power law to account for the upturn in scattering at low  $q$ .

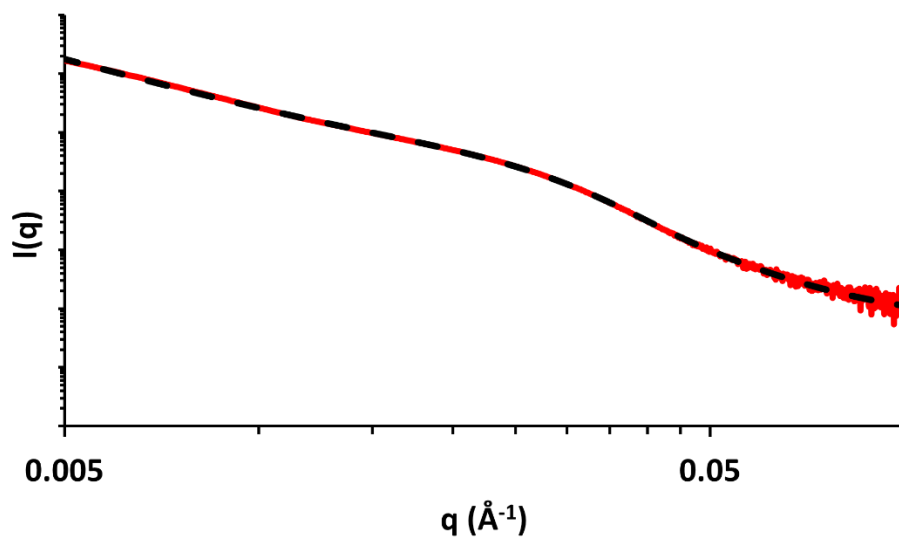

**Figure S8.** Background-subtracted SAXS data obtained for 1.0% w/w PHEMA<sub>30</sub>-PBzMA<sub>146</sub> in [EMIM][DCA] at 25 °C. Dashed lines represent the model fit obtained using the spherical micelle model.

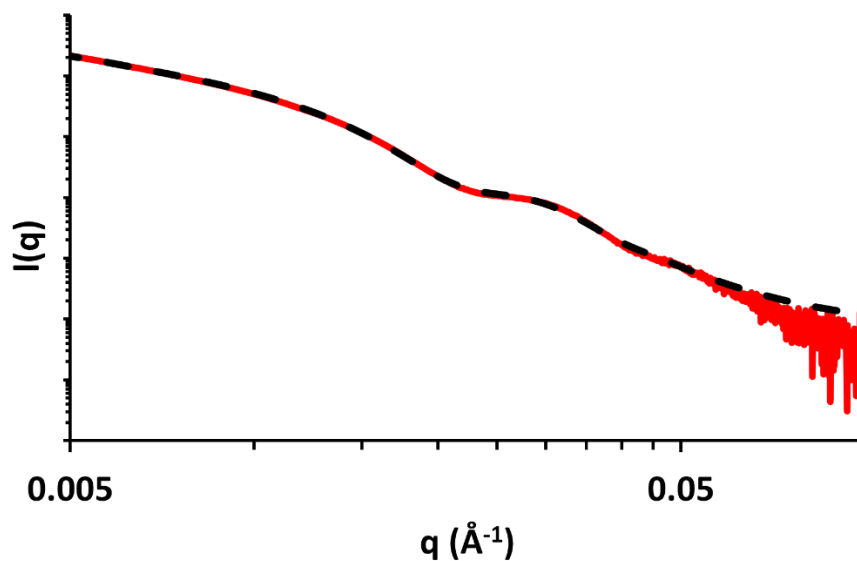

**Figure S9.** Background-subtracted SAXS data obtained for 1.0% w/w PHEMA<sub>30</sub>-PBzMA<sub>196</sub> in [EMIM][DCA] at 25 °C. Dashed lines represent the model fit obtained using a combination of the spherical micelle model and worm-like micelle model.

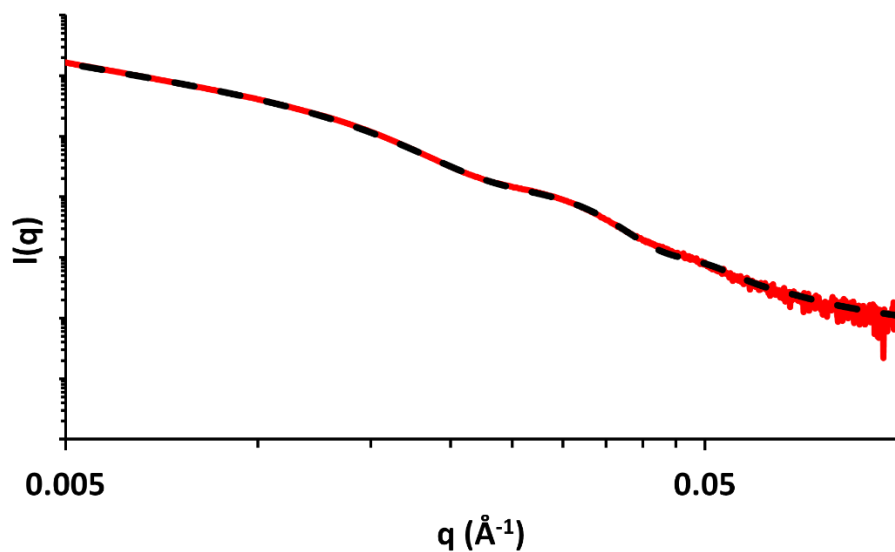

**Figure S10.** Background-subtracted SAXS data obtained for 1.0% w/w PHEMA<sub>30</sub>-PBzMA<sub>201</sub> in [EMIM][DCA] at 25 °C. Dashed lines represent the model fit obtained using a combination of the spherical micelle model and worm-like micelle model.

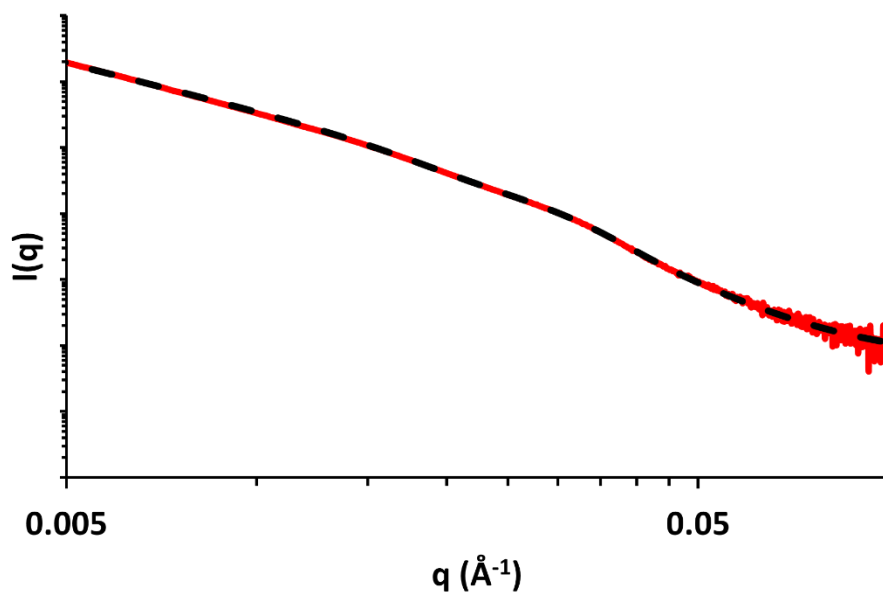

**Figure S11.** Background-subtracted SAXS data obtained for 1.0% w/w PHEMA<sub>30</sub>-PBzMA<sub>216</sub> in [EMIM][DCA] at 25 °C. Dashed lines represent the model fit obtained using a combination of the spherical micelle model and worm-like micelle model.

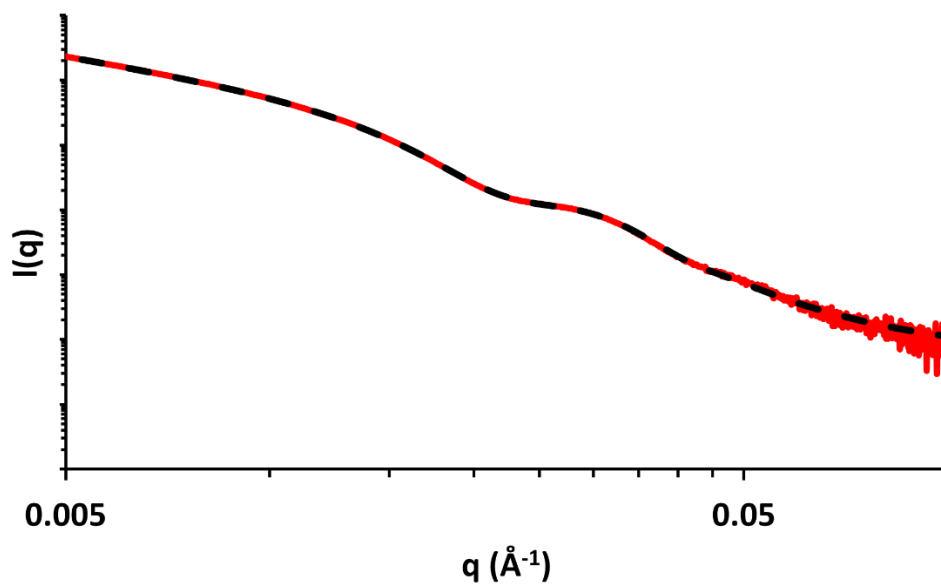

**Figure S12.** Background-subtracted SAXS data obtained for 1.0% w/w PHEMA<sub>30</sub>-PBzMA<sub>228</sub> in [EMIM][DCA] at 25 °C. Dashed lines represent the model fit obtained using a combination of the spherical micelle model and worm-like micelle model.

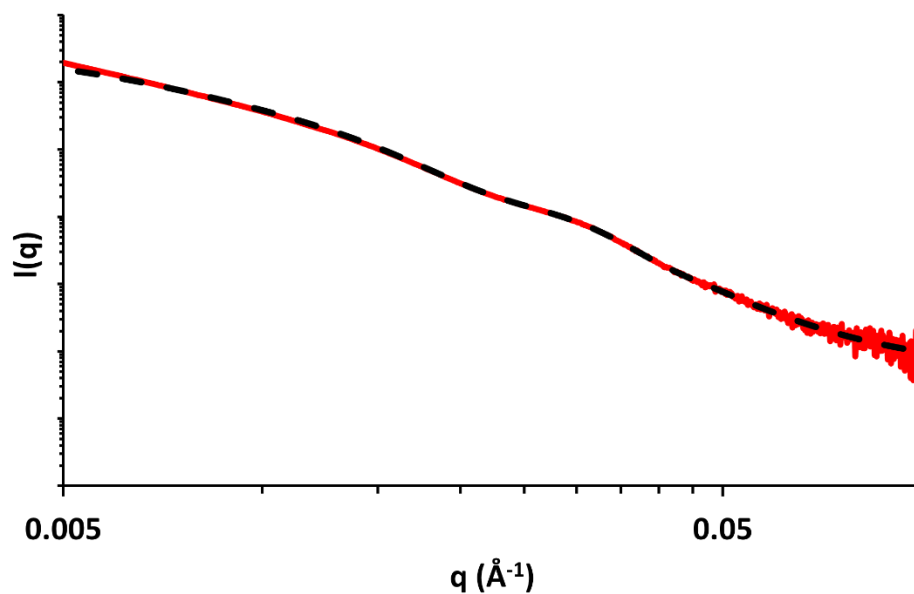

**Figure S13.** Background-subtracted SAXS data obtained for 1.0% w/w PHEMA<sub>30</sub>-PBzMA<sub>233</sub> in [EMIM][DCA] at 25 °C. Dashed lines represent the model fit obtained using a combination of the spherical micelle model and worm-like micelle model.

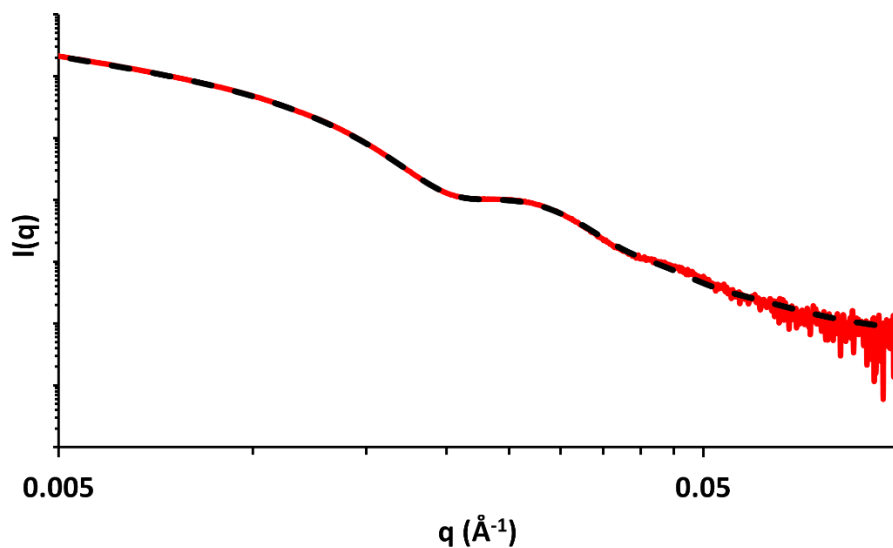

**Figure S14.** Background-subtracted SAXS data obtained for 1.0% w/w PHEMA<sub>30</sub>-PBzMA<sub>240</sub> in [EMIM][DCA] at 25 °C. Dashed lines represent the model fit obtained using a combination of the spherical micelle model and worm-like micelle model.

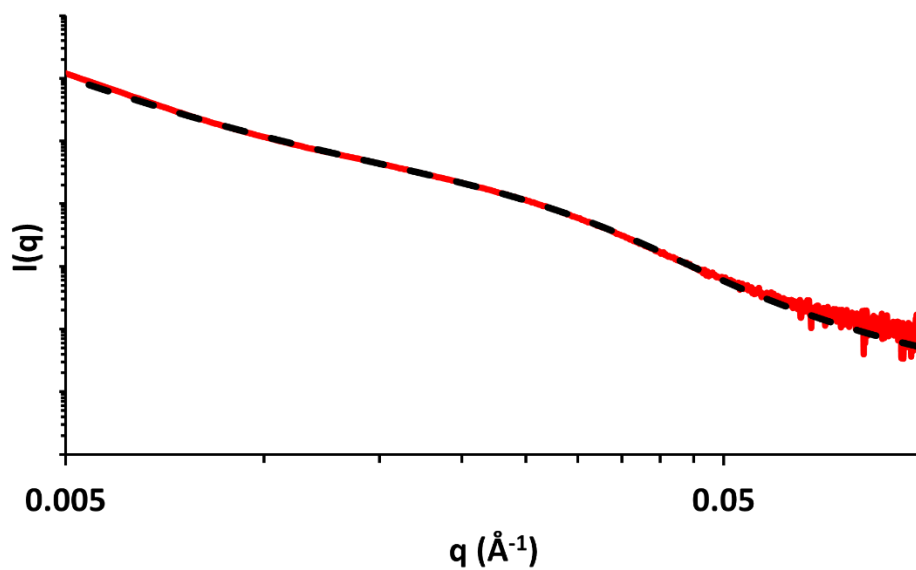

**Figure S15.** Background-subtracted SAXS data obtained for 1.0% w/w PHEMA<sub>30</sub>-PBzMA<sub>250</sub> in [EMIM][DCA] at 25 °C. Dashed lines represent the model fit obtained using the worm-like micelle model.

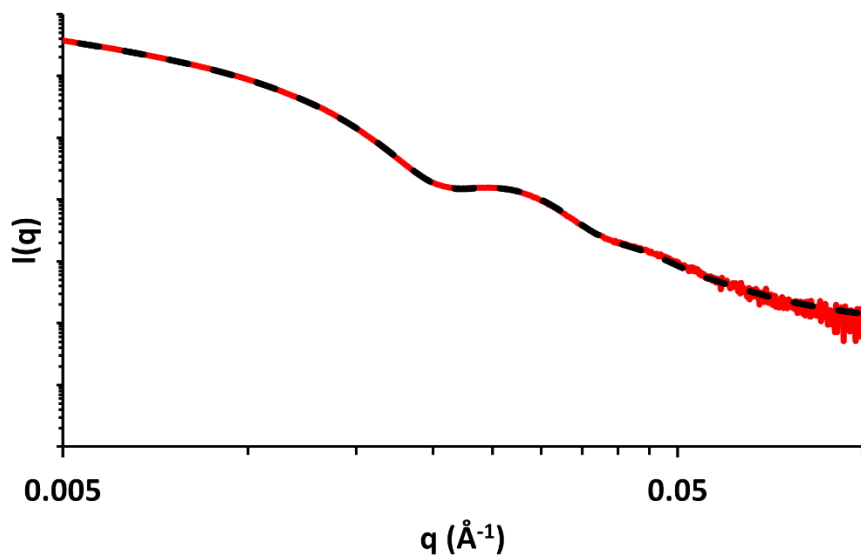

**Figure S16.** Background-subtracted SAXS data obtained for 1.0% w/w PHEMA<sub>30</sub>-PBzMA<sub>265</sub> in [EMIM][DCA] at 25 °C. Dashed lines represent the model fit obtained using a combination of the spherical micelle model and worm-like micelle model.

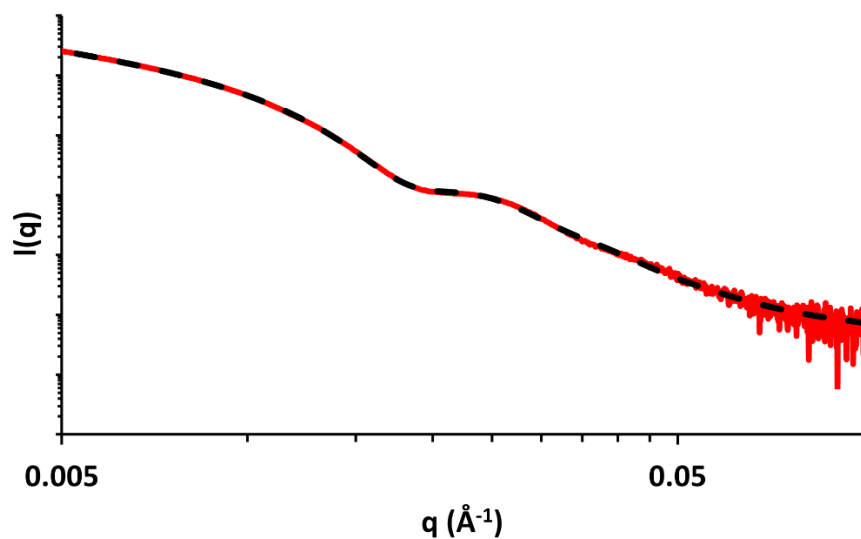

**Figure S17.** Background-subtracted SAXS data obtained for 1.0% w/w PHEMA<sub>30</sub>-PBzMA<sub>269</sub> in [EMIM][DCA] at 25 °C. Dashed lines represent the model fit obtained a combination of the spherical micelle model and worm-like micelle model.

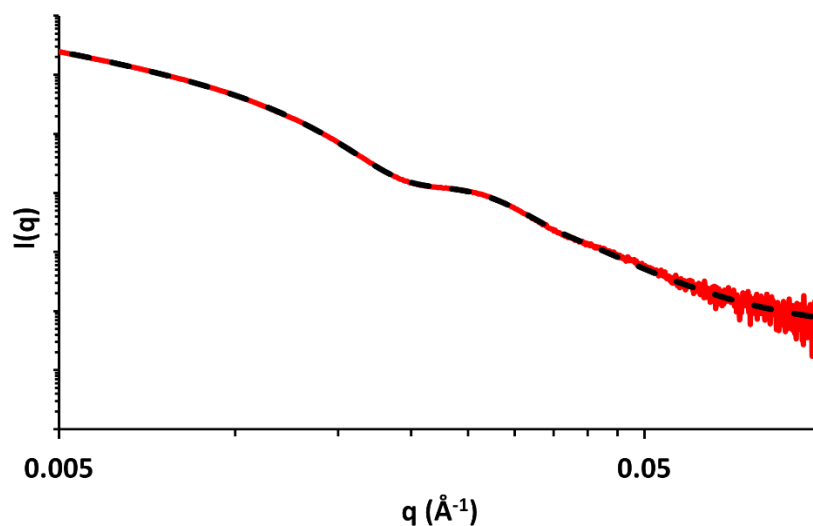

**Figure S18.** Background-subtracted SAXS data obtained for 1.0% w/w PHEMA<sub>30</sub>-PBzMA<sub>279</sub> in [EMIM][DCA] at 25 °C. Dashed lines represent the model fit obtained using a combination of the spherical micelle model and worm-like micelle model.

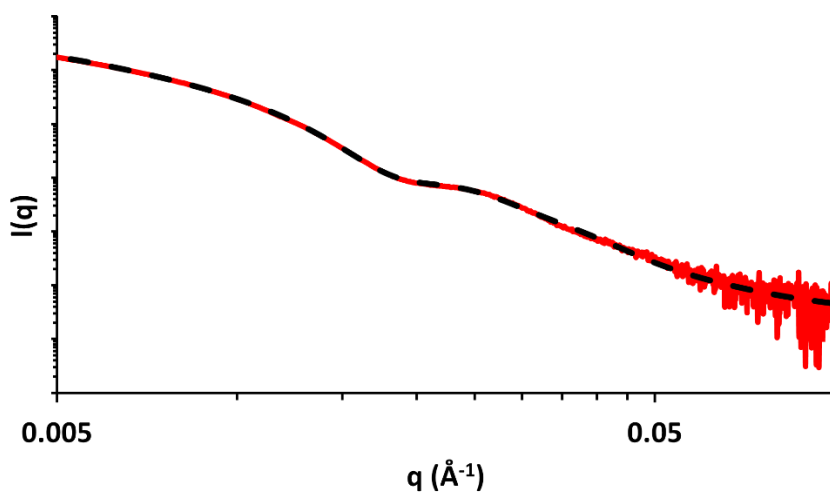

**Figure S19.** Background-subtracted SAXS data obtained for 1.0% w/w PHEMA<sub>30</sub>-PBzMA<sub>291</sub> in [EMIM][DCA] at 25 °C. Dashed lines represent the model fit obtained using a combination of the spherical micelle model and worm-like micelle model.

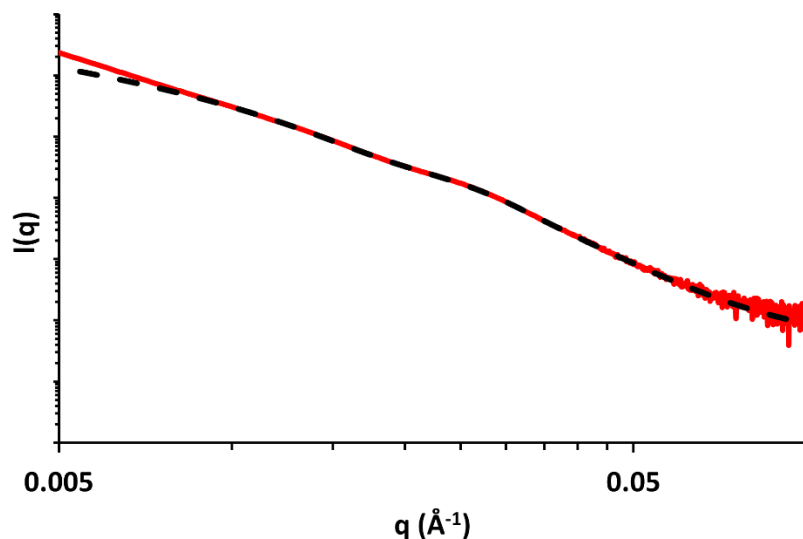

**Figure S20.** Background-subtracted SAXS data obtained for 1.0% w/w PHEMA<sub>30</sub>-PBzMA<sub>301</sub> in [EMIM][DCA] at 25 °C. Dashed lines represent the model fit obtained using a combination of the spherical micelle model and worm-like micelle model.

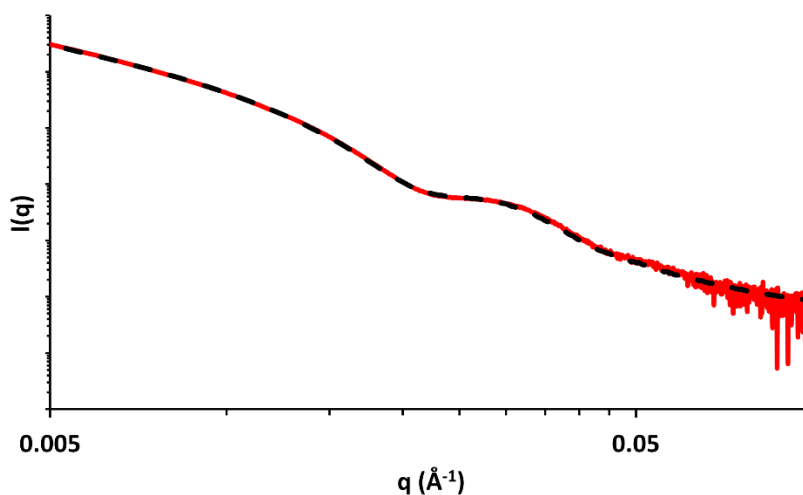

**Figure S21.** Background-subtracted SAXS data obtained for 1.0% w/w PHEMA<sub>30</sub>-PBzMA<sub>314</sub> in [EMIM][DCA] at 25 °C. Dashed lines represent the model fit obtained using a combination of the worm-like micelle and vesicle models.

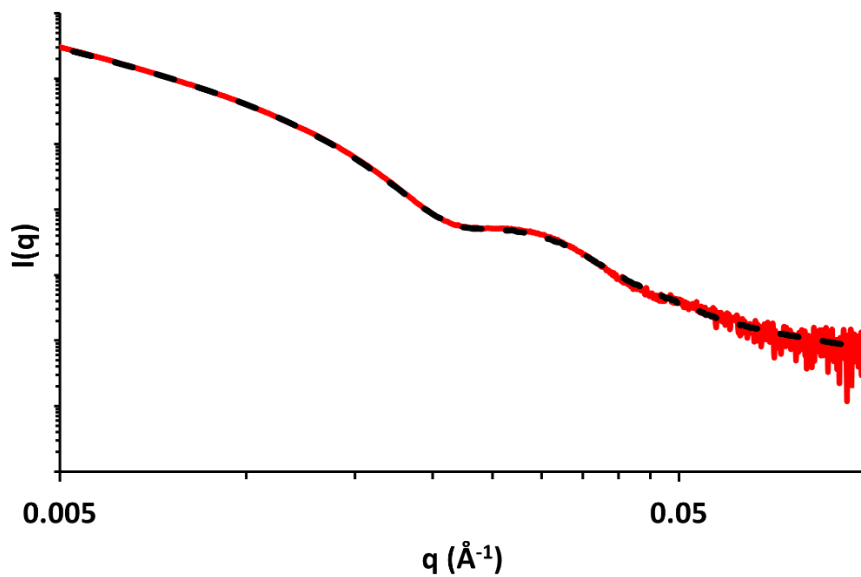

**Figure S22.** Background-subtracted SAXS data obtained for 1.0% w/w PHEMA<sub>30</sub>-PBzMA<sub>317</sub> in [EMIM][DCA] at 25 °C. Dashed lines represent the model fit obtained using a combination of the worm-like micelle and vesicle models.

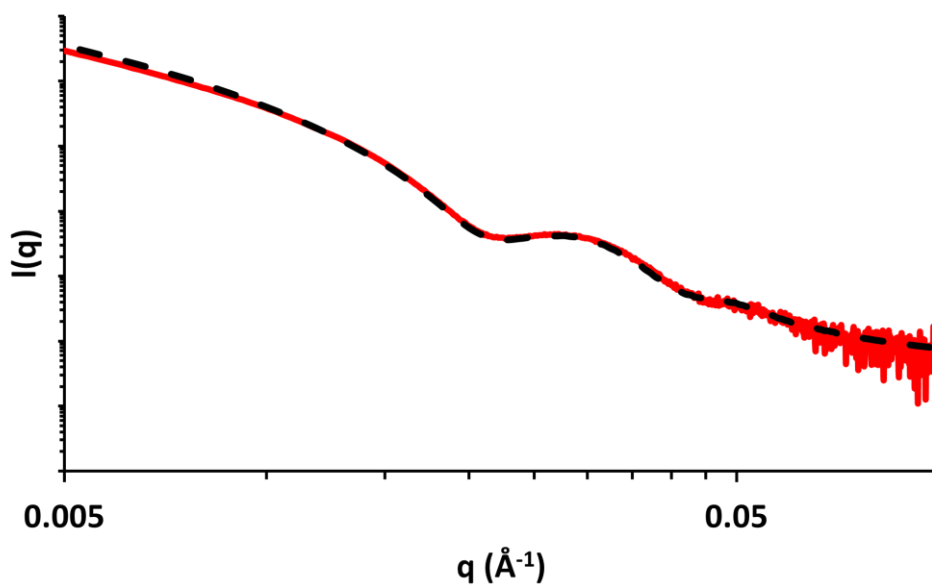

**Figure S23.** Background-subtracted SAXS data obtained for 1.0% w/w PHEMA<sub>30</sub>-PBzMA<sub>330</sub> in [EMIM][DCA] at 25 °C. Dashed lines represent the model fit obtained using a combination of the worm-like micelle and vesicle models.

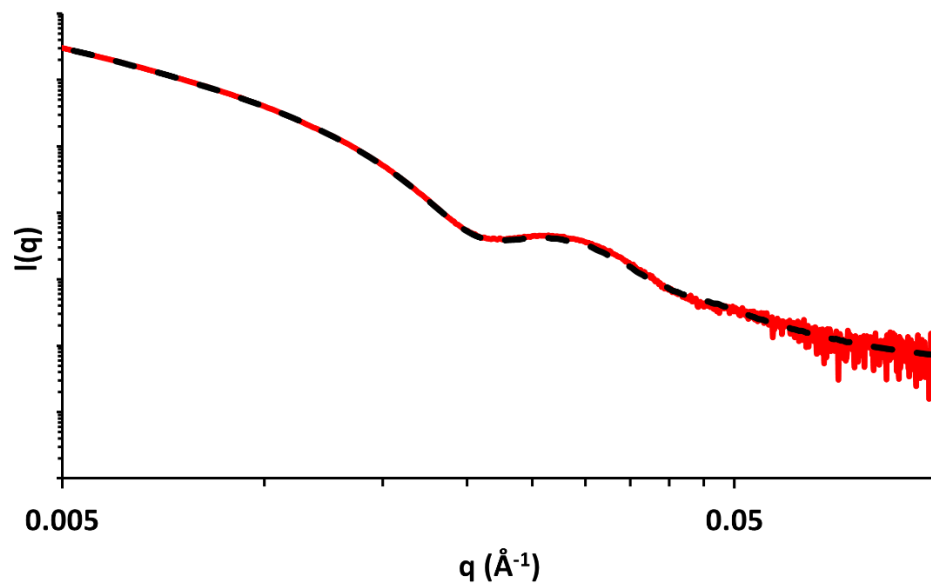

**Figure S24.** Background-subtracted SAXS data obtained for 1.0% w/w PHEMA<sub>30</sub>-PBzMA<sub>340</sub> in [EMIM][DCA] at 25 °C. Dashed lines represent the model fit obtained using a combination of the worm-like micelle and vesicle models.

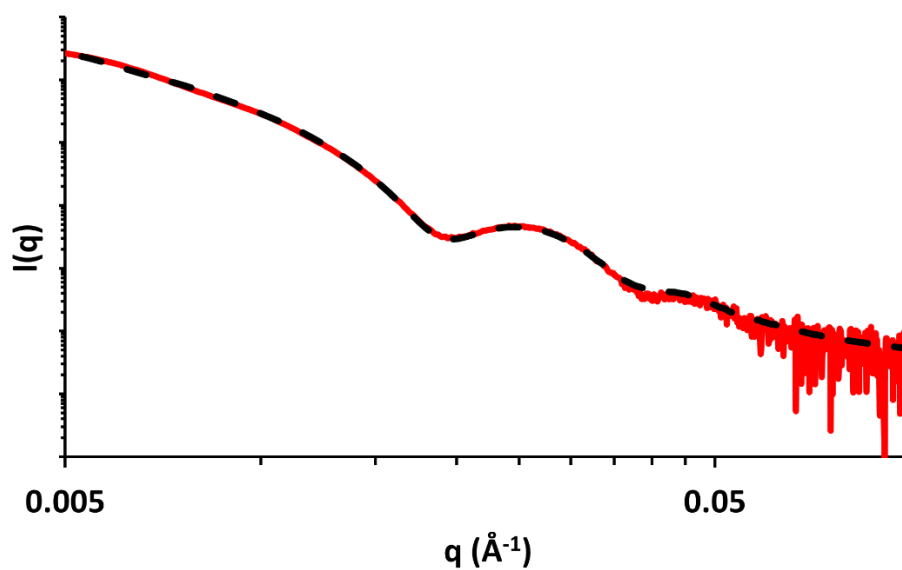

**Figure S25.** Background-subtracted SAXS data obtained for 1.0% w/w PHEMA<sub>30</sub>-PBzMA<sub>396</sub> in [EMIM][DCA] at 25 °C. Dashed lines represent the model fit obtained using the vesicle model.

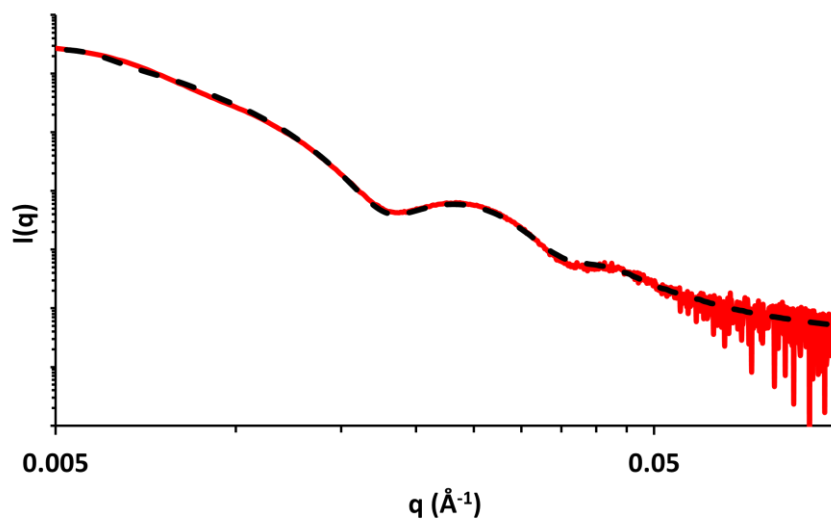

**Figure S26.** Background-subtracted SAXS data obtained for 1.0% w/w PHEMA<sub>30</sub>-PBzMA<sub>446</sub> in [EMIM][DCA] at 25 °C. Dashed lines represent the model fit obtained using a vesicle model.

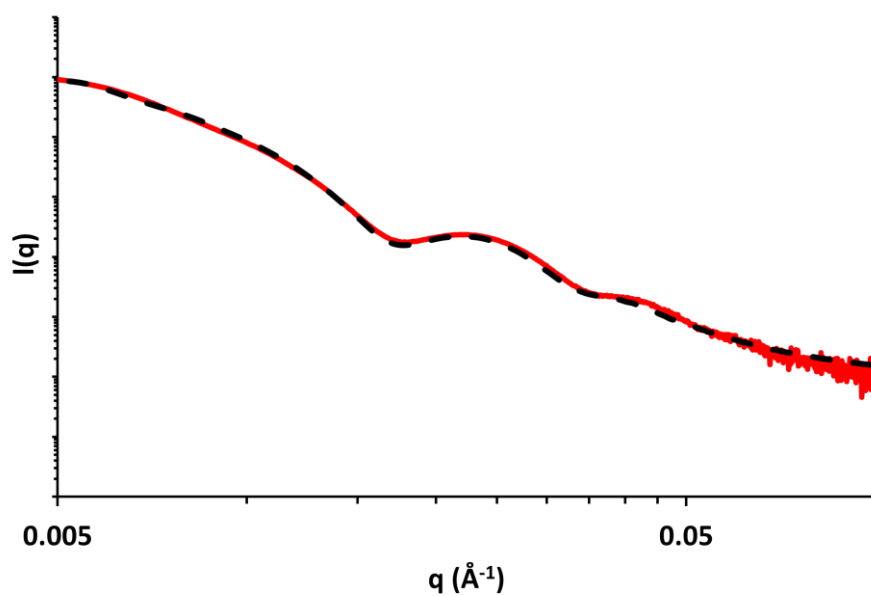

**Figure S27.** Background-subtracted SAXS data obtained for 1.0% w/w PHEMA<sub>30</sub>-PBzMA<sub>490</sub> in [EMIM][DCA] at 25 °C. Dashed lines represent the model fit obtained using a vesicle model.

### Additional oscillatory rheology data

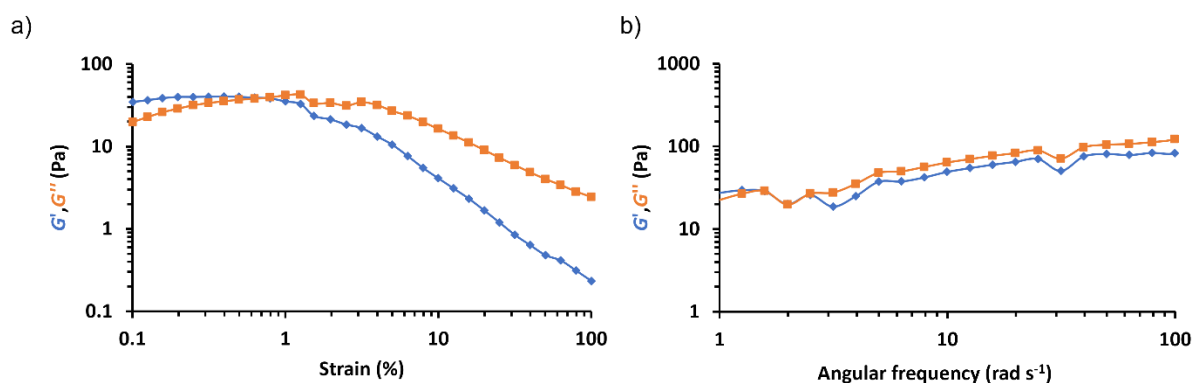

**Figure S28.** Oscillatory rheology data obtained for 15% w/w PHEMA<sub>30</sub>-PBzMA<sub>49</sub> in [EMIM][DCA] at 25 °C. a) Strain sweep at a fixed angular frequency of 6.28 rad s<sup>-1</sup> and b) frequency sweep at fixed a strain of 1.0%.

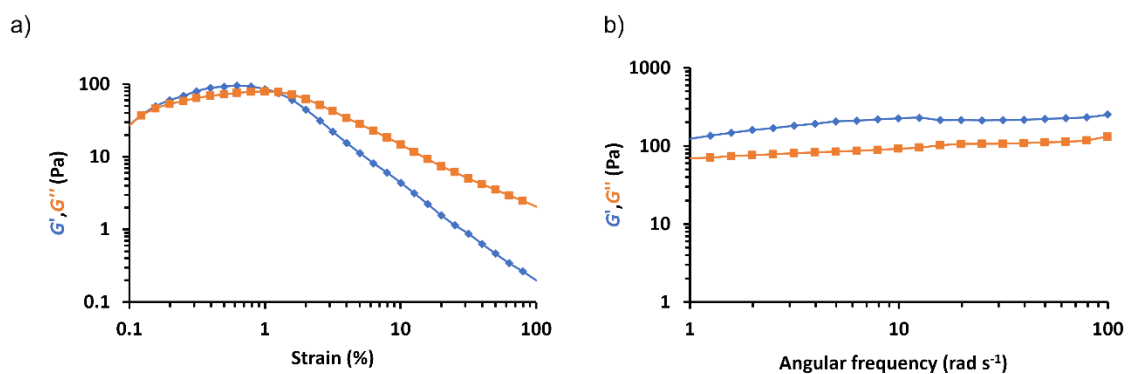

**Figure S29.** Oscillatory rheology data obtained for 15% w/w PHEMA<sub>30</sub>-PBzMA<sub>98</sub> in [EMIM][DCA] at 25 °C. a) Strain sweep at a fixed angular frequency of 6.28 rad s<sup>-1</sup> and b) frequency sweep at fixed a strain of 1.0%.

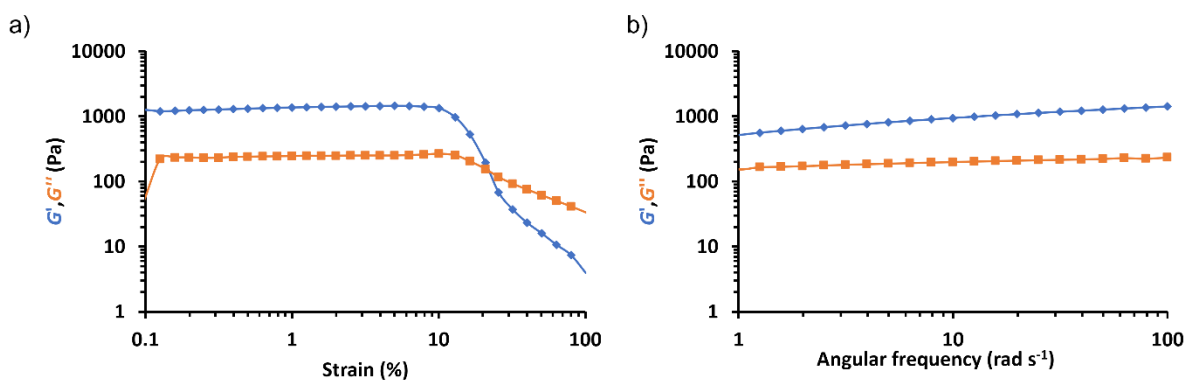

**Figure S30.** Oscillatory rheology data obtained for 15% w/w PHEMA<sub>30</sub>-PBzMA<sub>146</sub> in [EMIM][DCA] at 25 °C. a) Strain sweep at a fixed angular frequency of 6.28 rad s<sup>-1</sup> and b) frequency sweep at fixed a strain of 1.0%.

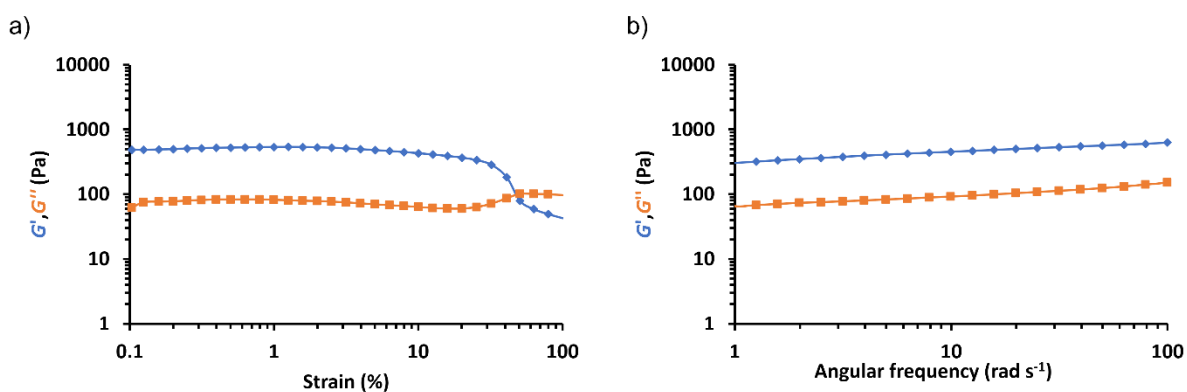

**Figure S31.** Oscillatory rheology data obtained for 15% w/w PHEMA<sub>30</sub>-PBzMA<sub>196</sub> in [EMIM][DCA] at 25 °C. a) Strain sweep at a fixed angular frequency of 6.28 rad s<sup>-1</sup> and b) frequency sweep at fixed a strain of 1.0%.

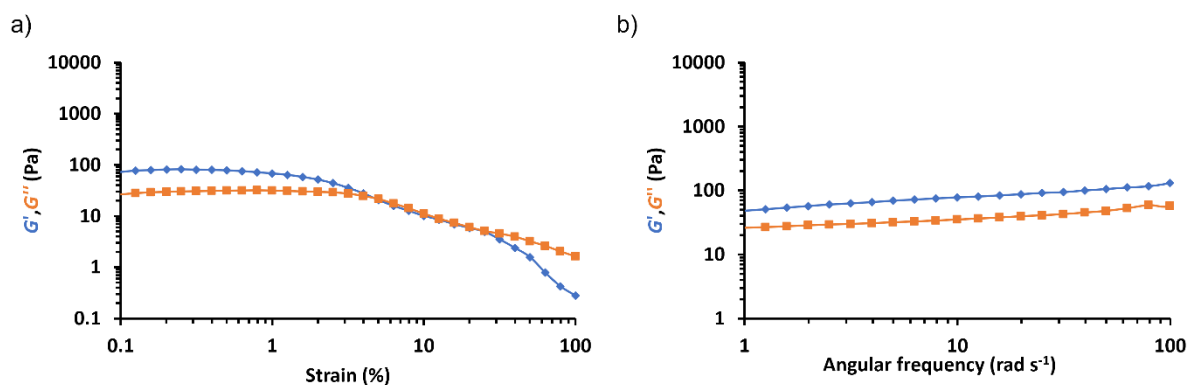

**Figure S32.** Oscillatory rheology data obtained for 15% w/w PHEMA<sub>30</sub>-PBzMA<sub>201</sub> in [EMIM][DCA] at 25 °C. a) Strain sweep at a fixed angular frequency of 6.28 rad s<sup>-1</sup> and b) frequency sweep at fixed a strain of 1.0%.

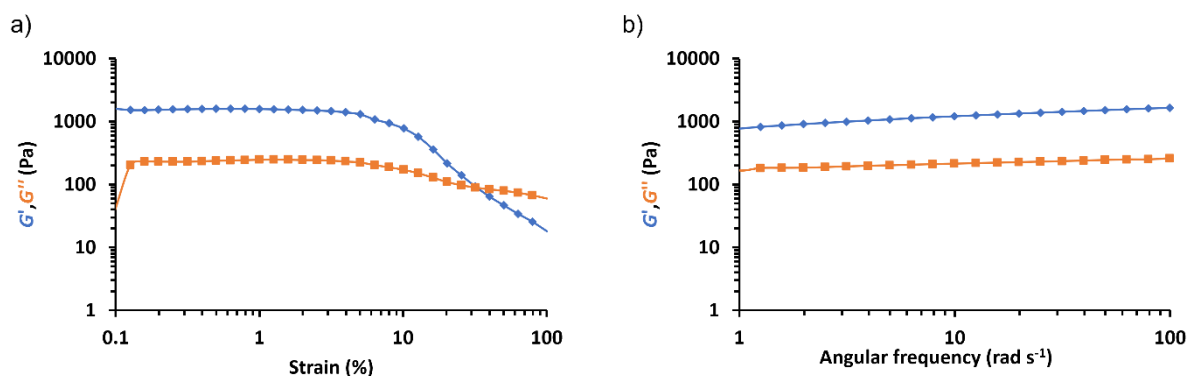

**Figure S33.** Oscillatory rheology data obtained for 15% w/w PHEMA<sub>30</sub>-PBzMA<sub>216</sub> in [EMIM][DCA] at 25 °C. a) Strain sweep at a fixed angular frequency of 6.28 rad s<sup>-1</sup> and b) frequency sweep at fixed a strain of 1.0%.

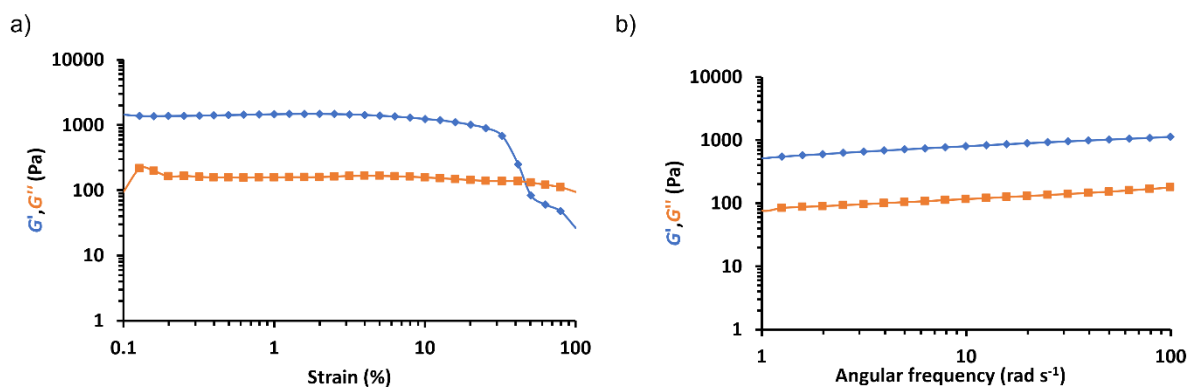

**Figure S34.** Oscillatory rheology data obtained for 15% w/w PHEMA<sub>30</sub>-PBzMA<sub>228</sub> in [EMIM][DCA] at 25 °C. a) Strain sweep at a fixed angular frequency of 6.28 rad s<sup>-1</sup> and b) frequency sweep at fixed a strain of 1.0%.

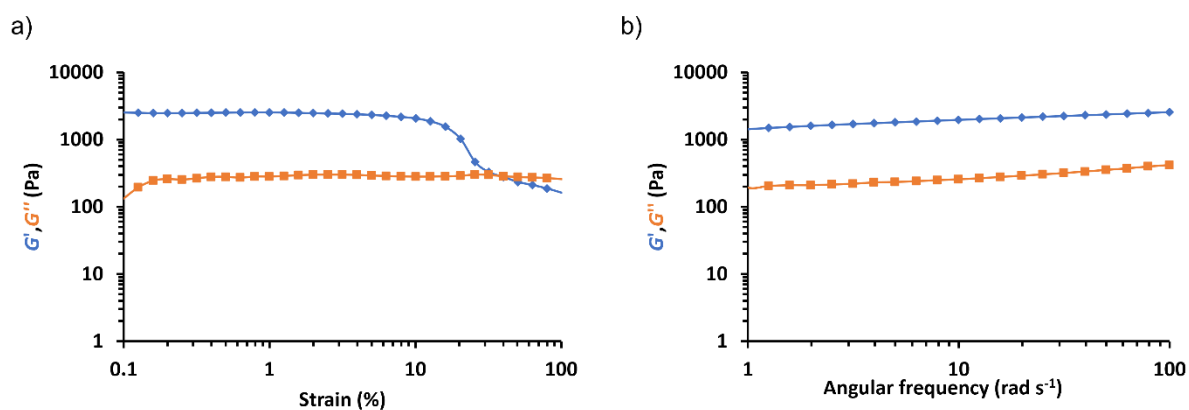

**Figure S35.** Oscillatory rheology data obtained for 15% w/w PHEMA<sub>30</sub>-PBzMA<sub>233</sub> in [EMIM][DCA] at 25 °C. a) Strain sweep at a fixed angular frequency of 6.28 rad s<sup>-1</sup> and b) frequency sweep at fixed a strain of 1.0%.

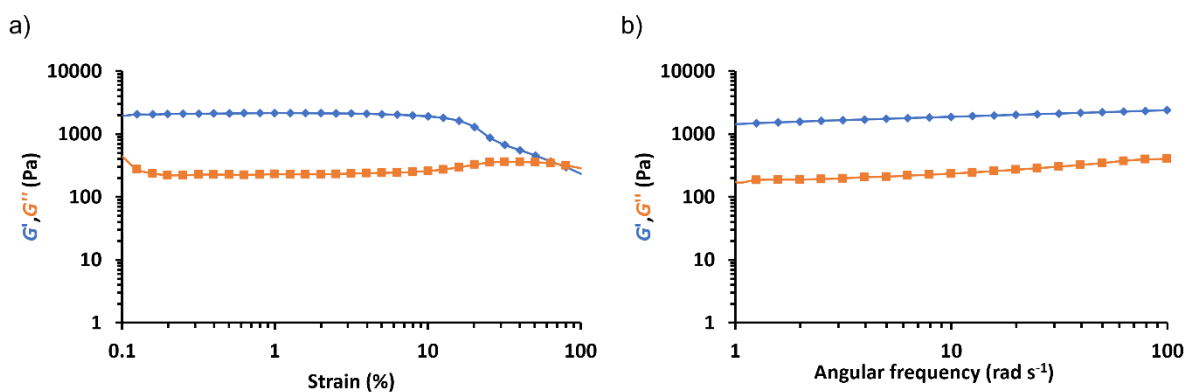

**Figure S36.** Oscillatory rheology data obtained for 15% w/w PHEMA<sub>30</sub>-PBzMA<sub>243</sub> in [EMIM][DCA] at 25 °C. a) Strain sweep at a fixed angular frequency of 6.28 rad s<sup>-1</sup> and b) frequency sweep at fixed a strain of 1.0%.

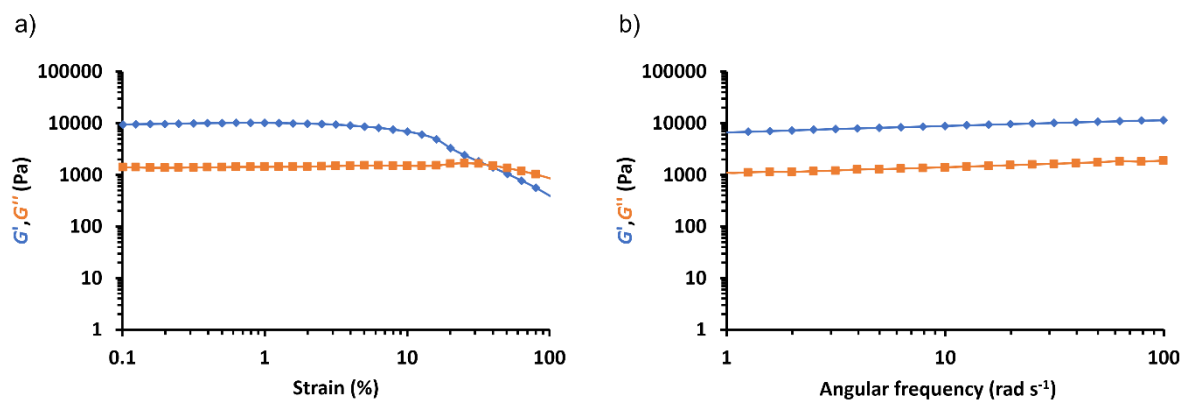

**Figure S37.** Oscillatory rheology data obtained for 15% w/w PHEMA<sub>30</sub>-PBzMA<sub>250</sub> in [EMIM][DCA] at 25 °C. a) Strain sweep at a fixed angular frequency of 6.28 rad s<sup>-1</sup> and b) frequency sweep at fixed a strain of 1.0%.

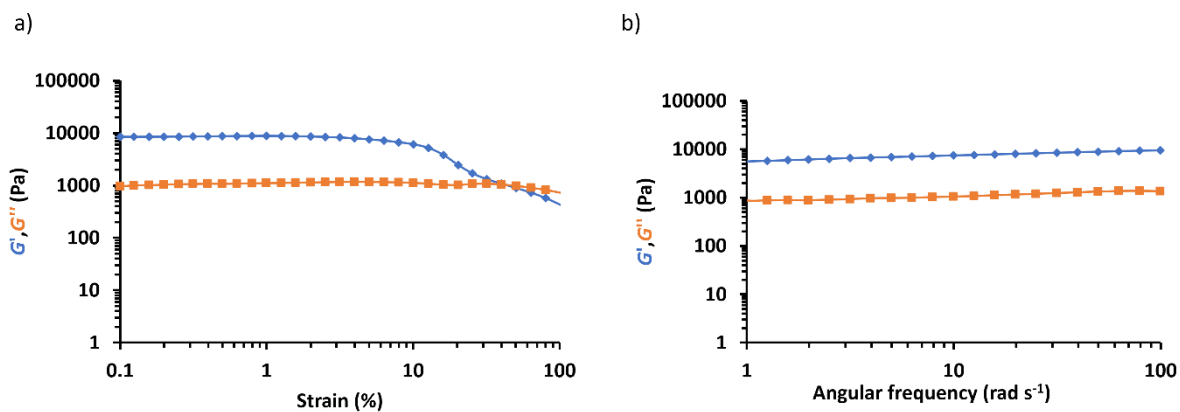

**Figure S38.** Oscillatory rheology data obtained for 15% w/w PHEMA<sub>30</sub>-PBzMA<sub>265</sub> in [EMIM][DCA] at 25 °C. a) Strain sweep at a fixed angular frequency of 6.28 rad s<sup>-1</sup> and b) frequency sweep at fixed a strain of 1.0%.

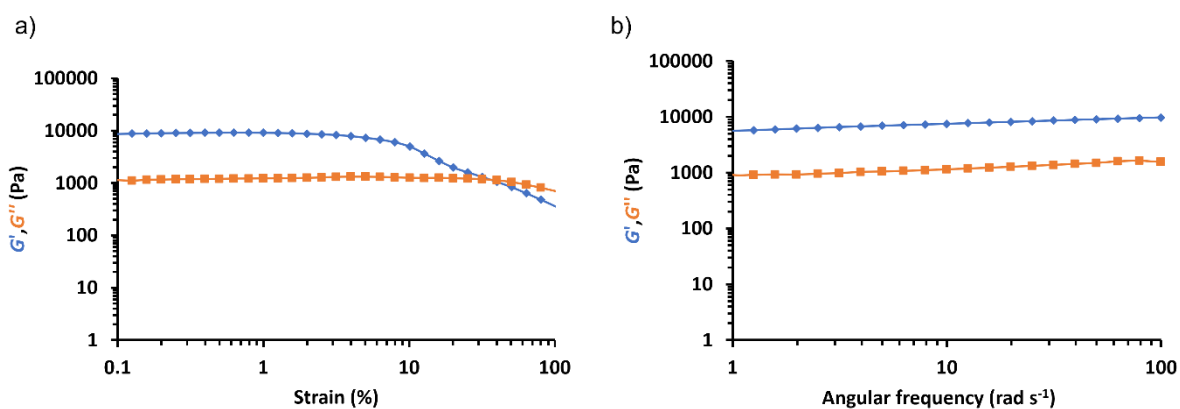

**Figure S39.** Oscillatory rheology data obtained for 15% w/w PHEMA<sub>30</sub>-PBzMA<sub>269</sub> in [EMIM][DCA] at 25 °C. a) Strain sweep at a fixed angular frequency of 6.28 rad s<sup>-1</sup> and b) frequency sweep at fixed a strain of 1.0%.

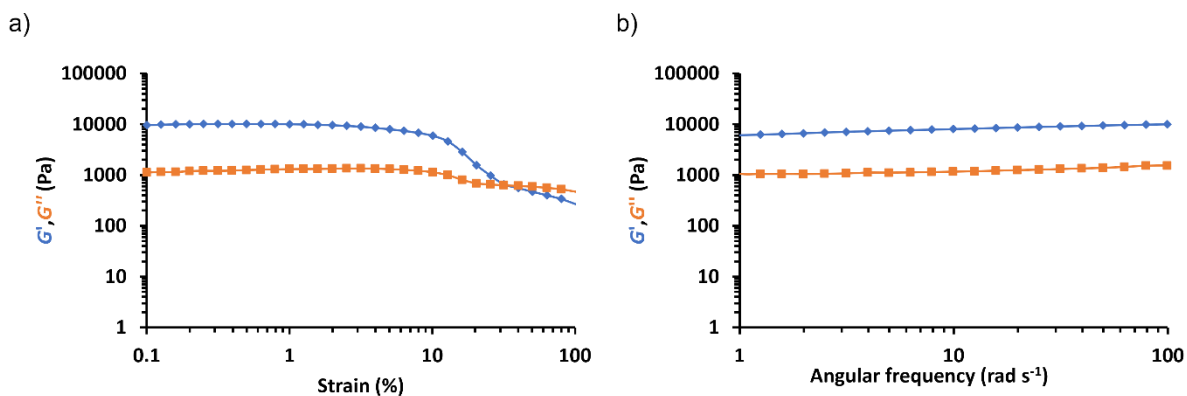

**Figure S40.** Oscillatory rheology data obtained for 15% w/w PHEMA<sub>30</sub>-PBzMA<sub>279</sub> in [EMIM][DCA] at 25 °C. a) Strain sweep at a fixed angular frequency of 6.28 rad s<sup>-1</sup> and b) frequency sweep at fixed a strain of 1.0%.

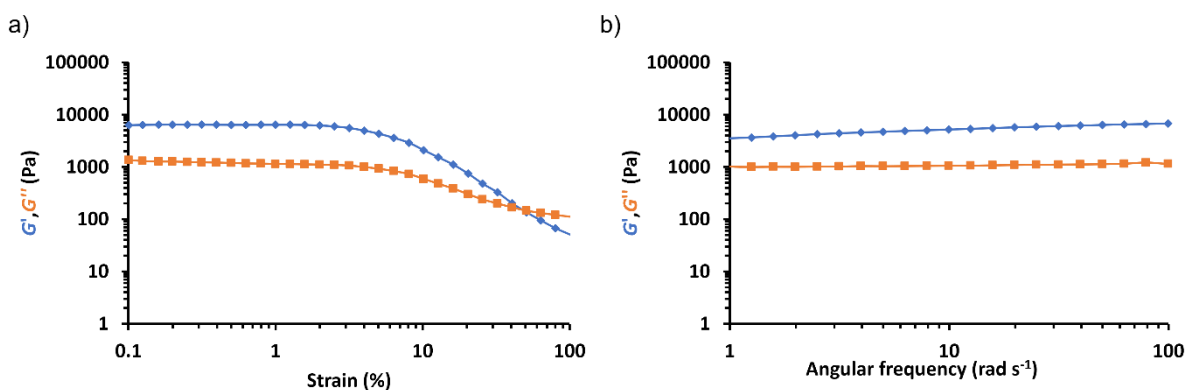

**Figure S41.** Oscillatory rheology data obtained for 15% w/w PHEMA<sub>30</sub>-PBzMA<sub>301</sub> in [EMIM][DCA] at 25 °C. a) Strain sweep at a fixed angular frequency of 6.28 rad s<sup>-1</sup> and b) frequency sweep at fixed a strain of 1.0%.

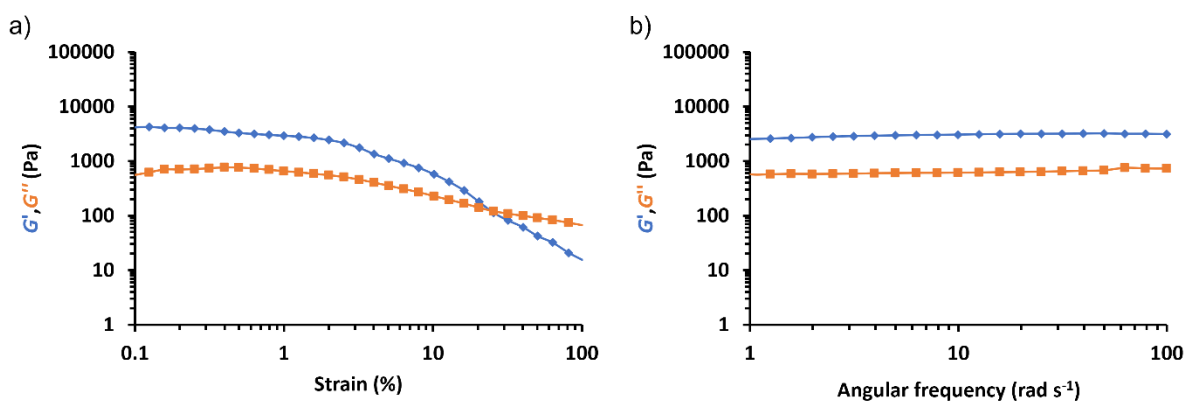

**Figure S42.** Oscillatory rheology data obtained for 15% w/w PHEMA<sub>30</sub>-PBzMA<sub>314</sub> in [EMIM][DCA] at 25 °C. a) Strain sweep at a fixed angular frequency of 6.28 rad s<sup>-1</sup> and b) frequency sweep at fixed a strain of 1.0%.

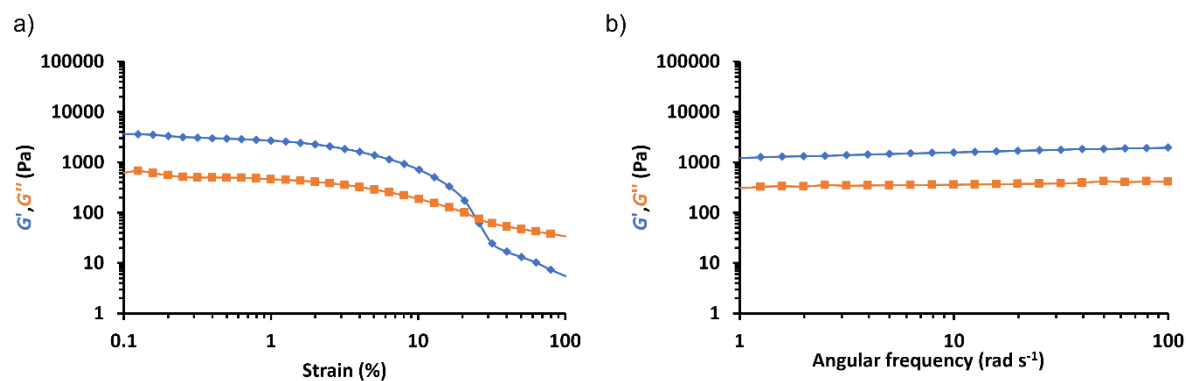

**Figure S43.** Oscillatory rheology data obtained for 15% w/w PHEMA<sub>30</sub>-PBzMA<sub>317</sub> in [EMIM][DCA] at 25 °C. a) Strain sweep at a fixed angular frequency of 6.28 rad s<sup>-1</sup> and b) frequency sweep at fixed a strain of 1.0%.

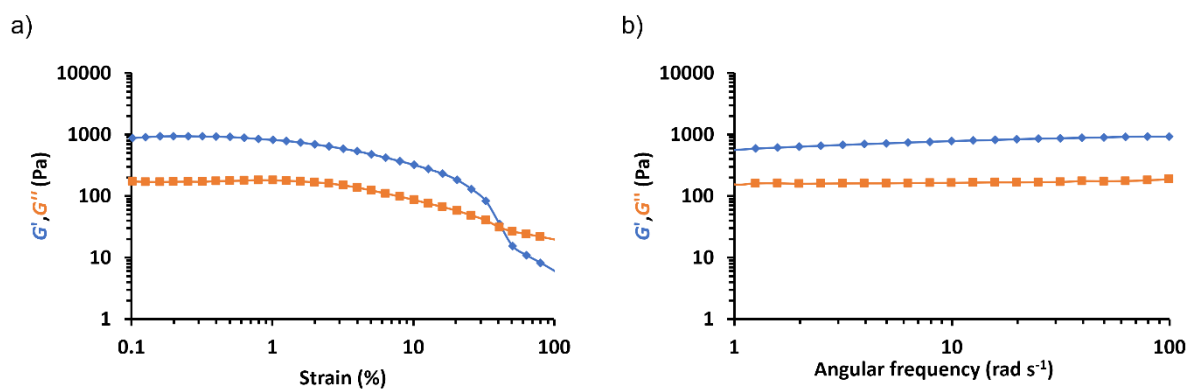

**Figure S44.** Oscillatory rheology data obtained for 15% w/w PHEMA<sub>30</sub>-PBzMA<sub>330</sub> in [EMIM][DCA] at 25 °C. a) Strain sweep at a fixed angular frequency of 6.28 rad s<sup>-1</sup> and b) frequency sweep at fixed a strain of 1.0%.

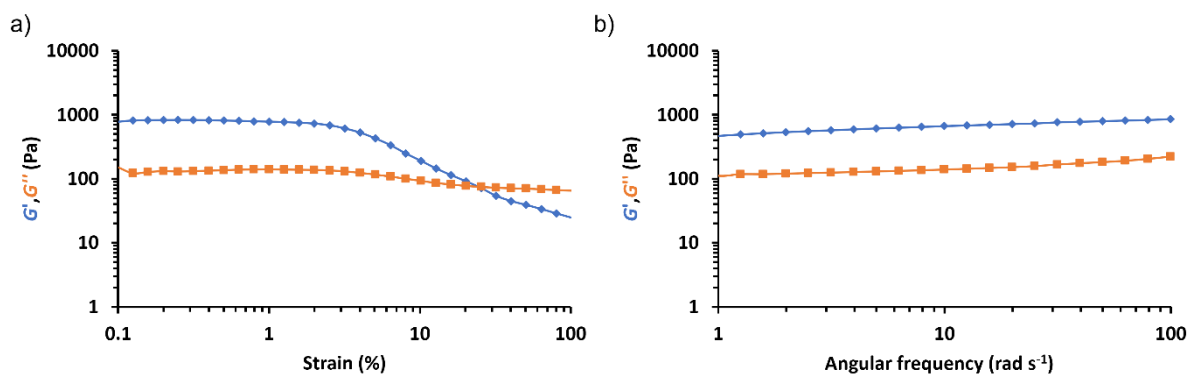

**Figure S45.** Oscillatory rheology data obtained for 15% w/w PHEMA<sub>30</sub>-PBzMA<sub>340</sub> in [EMIM][DCA] at 25 °C. a) Strain sweep at a fixed angular frequency of 6.28 rad s<sup>-1</sup> and b) frequency sweep at fixed a strain of 1.0%.

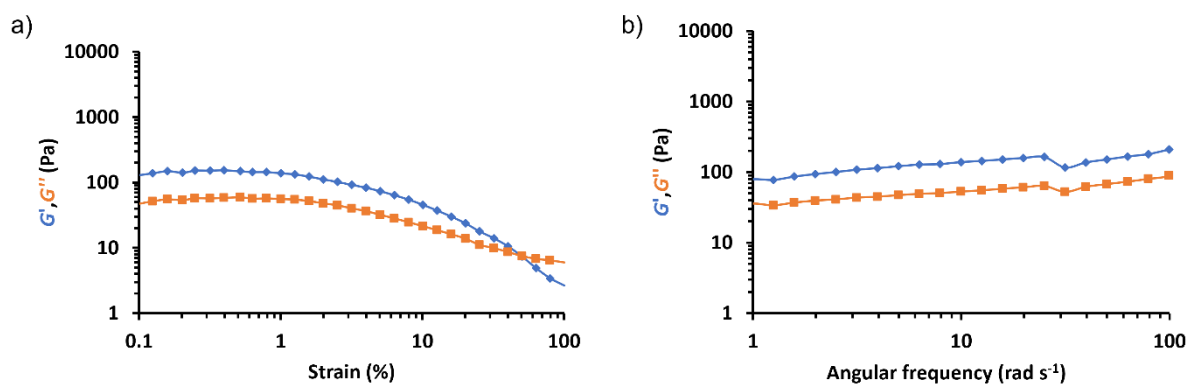

**Figure S46.** Oscillatory rheology data obtained for 15% w/w PHEMA<sub>30</sub>-PBzMA<sub>396</sub> in [EMIM][DCA] at 25 °C. a) Strain sweep at a fixed angular frequency of 6.28 rad s<sup>-1</sup> and b) frequency sweep at fixed a strain of 1.0%.

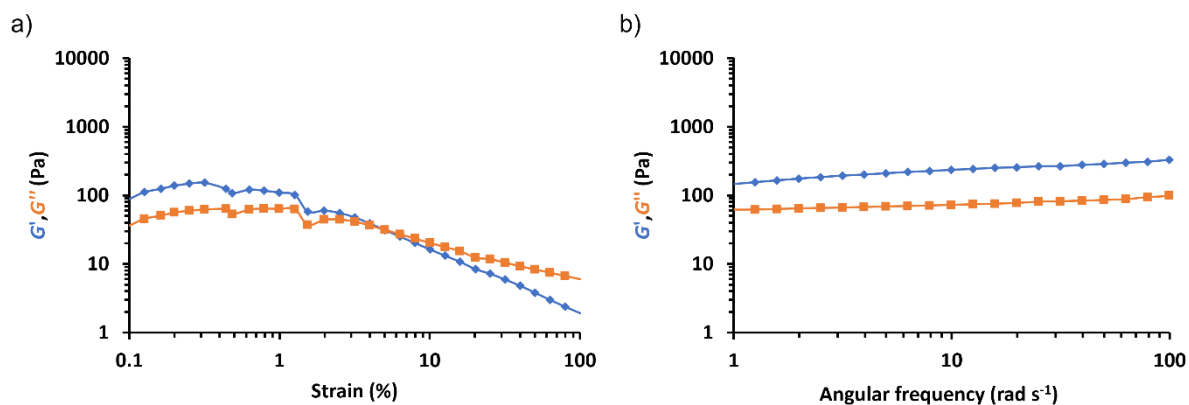

**Figure S47.** Oscillatory rheology data obtained for 15% w/w PHEMA<sub>30</sub>-PBzMA<sub>446</sub> in [EMIM][DCA] at 25 °C. a) Strain sweep at a fixed angular frequency of 6.28 rad s<sup>-1</sup> and b) frequency sweep at fixed a strain of 1.0%.

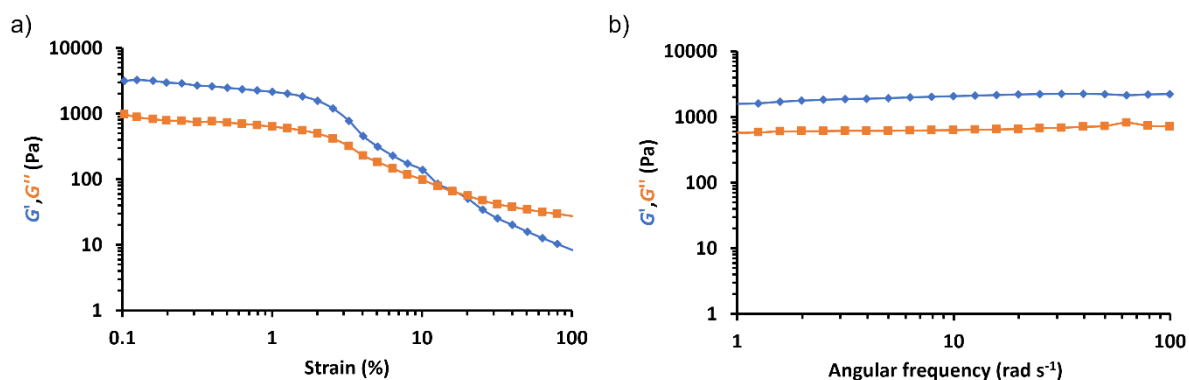

**Figure S48.** Oscillatory rheology data obtained for 15% w/w PHEMA<sub>30</sub>-PBzMA<sub>490</sub> in [EMIM][DCA] at 25 °C. a) Strain sweep at a fixed angular frequency of 6.28 rad s<sup>-1</sup> and b) frequency sweep at fixed a strain of 1.0%.

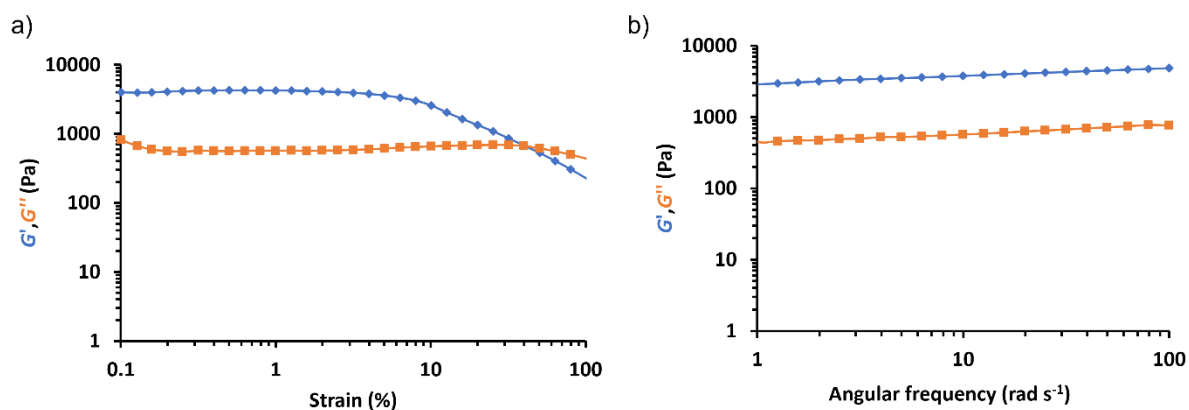

**Figure S49.** Oscillatory rheology data obtained for 10% w/w PHEMA<sub>30</sub>-PBzMA<sub>270</sub> in [EMIM][DCA] at 25 °C. a) Strain sweep at a fixed angular frequency of 6.28 rad s<sup>-1</sup> and b) frequency sweep at fixed a strain of 1.0%.

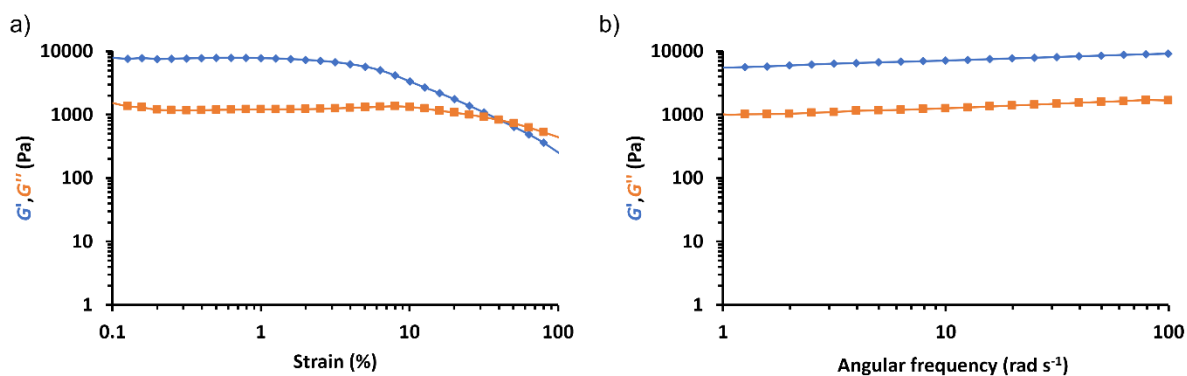

**Figure S50.** Oscillatory rheology data obtained for 9% w/w PHEMA<sub>30</sub>-PBzMA<sub>282</sub> in [EMIM][DCA] at 25 °C. a) Strain sweep at a fixed angular frequency of 6.28 rad s<sup>-1</sup> and b) frequency sweep at fixed a strain of 1.0%.

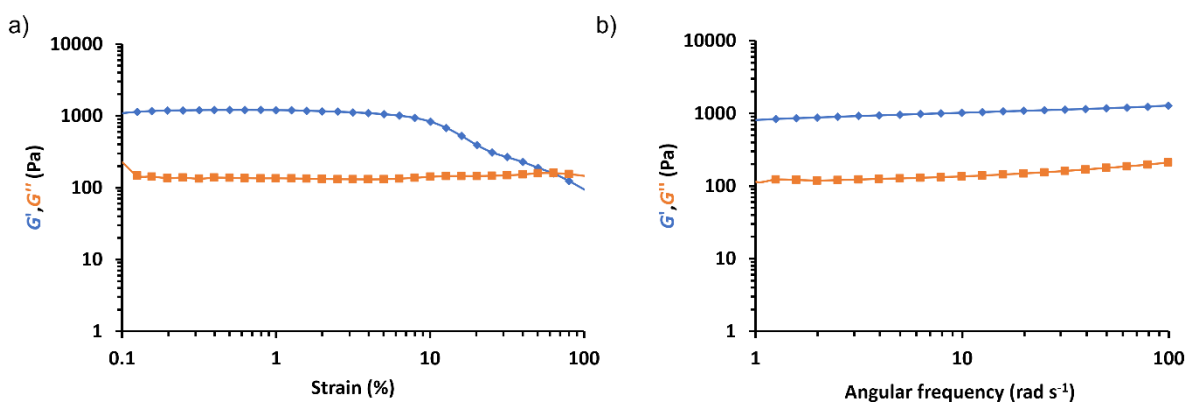

**Figure S51.** Oscillatory rheology data obtained for 8% w/w PHEMA<sub>30</sub>-PBzMA<sub>267</sub> in [EMIM][DCA] at 25 °C. a) Strain sweep at a fixed angular frequency of 6.28 rad s<sup>-1</sup> and b) frequency sweep at fixed a strain of 1.0%.

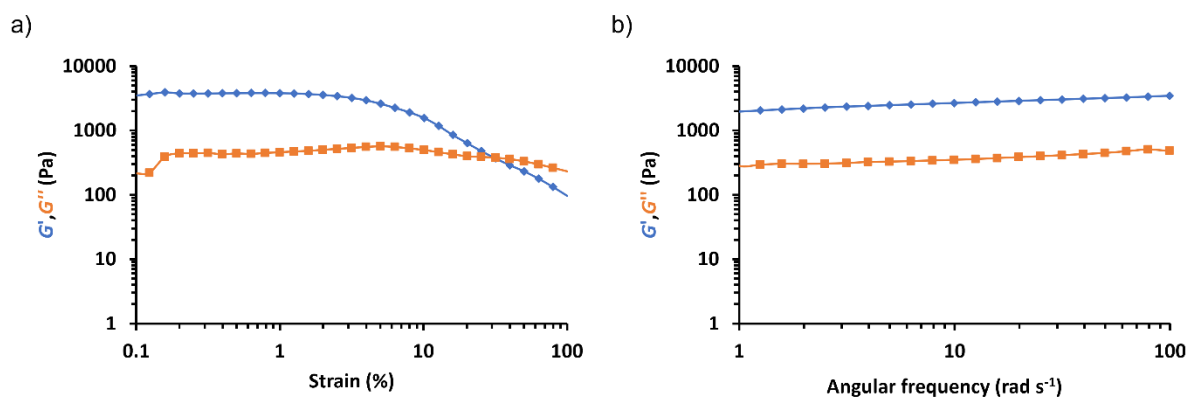

**Figure S52.** Oscillatory rheology data obtained for 7% w/w PHEMA<sub>30</sub>-PBzMA<sub>267</sub> in [EMIM][DCA] at 25 °C. a) Strain sweep at a fixed angular frequency of 6.28 rad s<sup>-1</sup> and b) frequency sweep at fixed a strain of 1.0%.

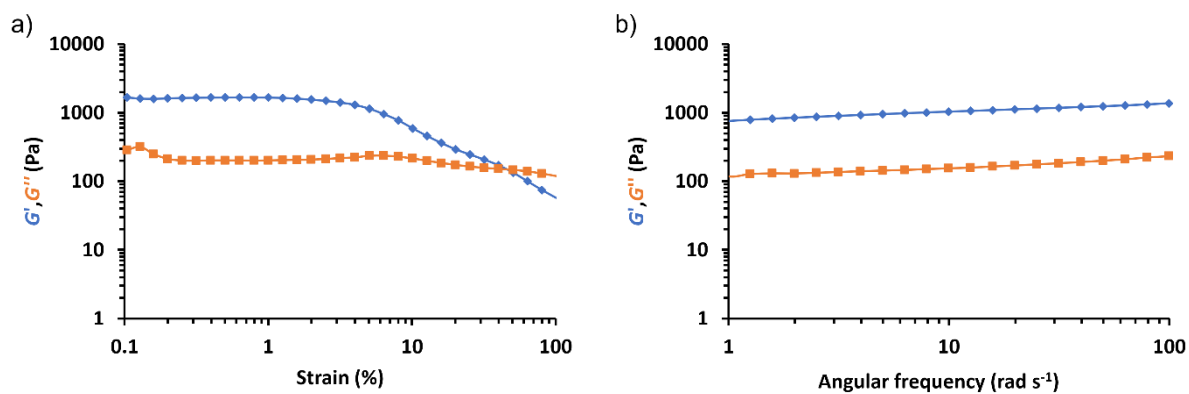

**Figure S53.** Oscillatory rheology data obtained for 6% w/w PHEMA<sub>30</sub>-PBzMA<sub>294</sub> in [EMIM][DCA] at 25 °C. a) Strain sweep at a fixed angular frequency of 6.28 rad s<sup>-1</sup> and b) frequency sweep at fixed a strain of 1.0%.

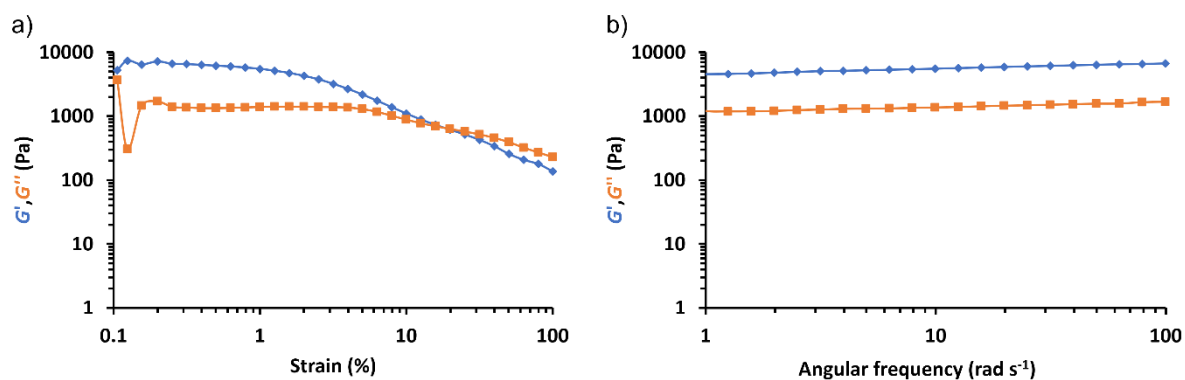

**Figure S54.** Oscillatory rheology data obtained for 5% w/w PHEMA<sub>30</sub>-PBzMA<sub>291</sub> in [EMIM][DCA] at 25 °C. a) Strain sweep at a fixed angular frequency of 6.28 rad s<sup>-1</sup> and b) frequency sweep at fixed a strain of 1.0%.

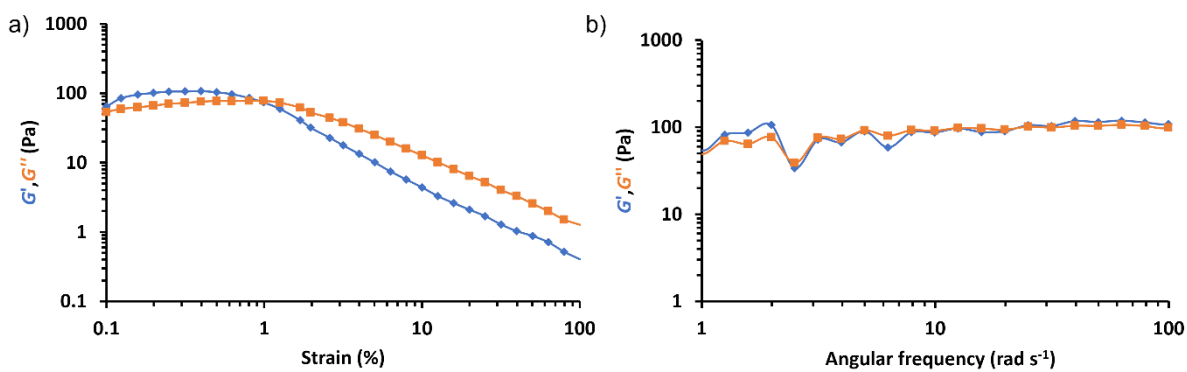

**Figure S55.** Oscillatory rheology data obtained for 4% w/w PHEMA<sub>30</sub>-PBzMA<sub>294</sub> in [EMIM][DCA] at 25 °C. a) Strain sweep at a fixed angular frequency of 6.28 rad s<sup>-1</sup> and b) frequency sweep at fixed a strain of 1.0%.

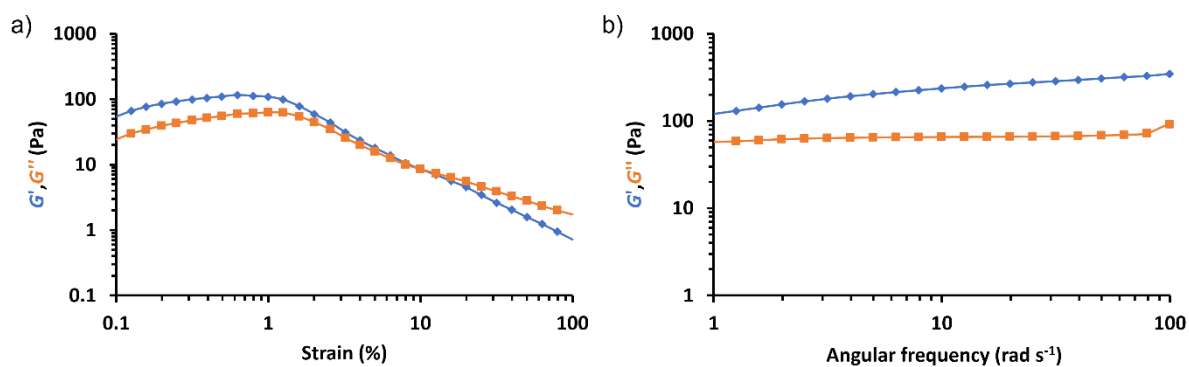

**Figure S56.** Oscillatory rheology data obtained for 3% w/w PHEMA<sub>30</sub>-PBzMA<sub>276</sub> in [EMIM][DCA] at 25 °C. a) Strain sweep at a fixed angular frequency of 6.28 rad s<sup>-1</sup> and b) frequency sweep at fixed a strain of 1.0%.

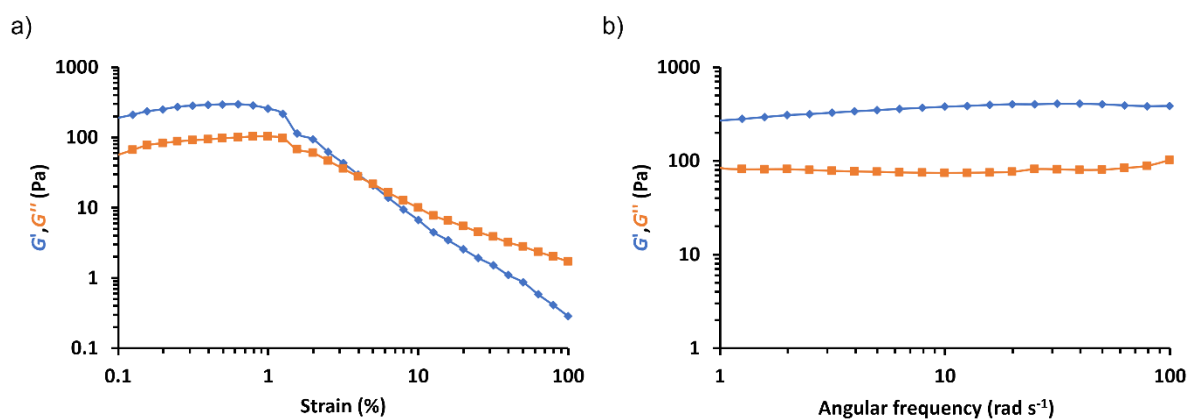

**Figure S57.** Oscillatory rheology data obtained for 2% w/w PHEMA<sub>30</sub>-PBzMA<sub>297</sub> in [EMIM][DCA] at 25 °C. a) Strain sweep at a fixed angular frequency of 6.28 rad s<sup>-1</sup> and b) frequency sweep at fixed a strain of 1.0%.

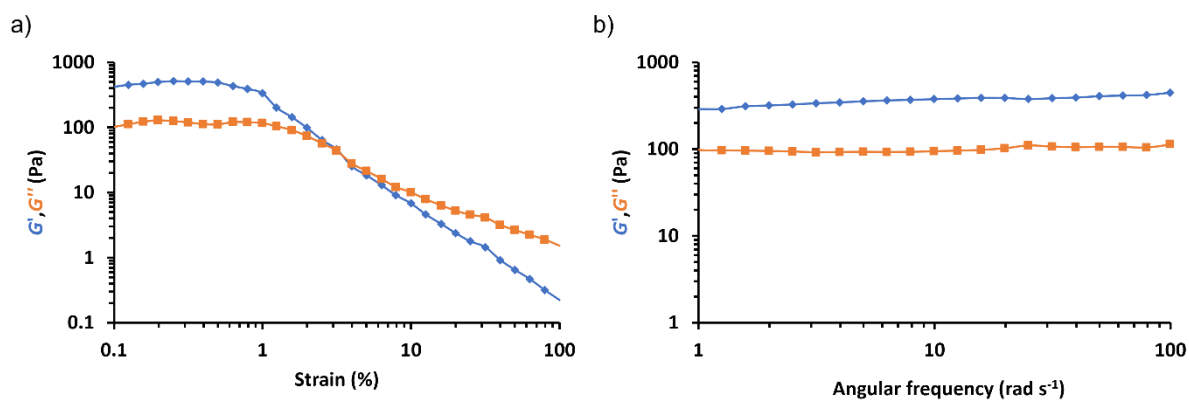

**Figure S58.** Oscillatory rheology data obtained for 1% w/w PHEMA<sub>30</sub>-PBzMA<sub>285</sub> in [EMIM][DCA] at 25 °C. a) Strain sweep at a fixed angular frequency of 6.28 rad s<sup>-1</sup> and b) frequency sweep at fixed a strain of 1.0%.

### Thermogravimetric analysis

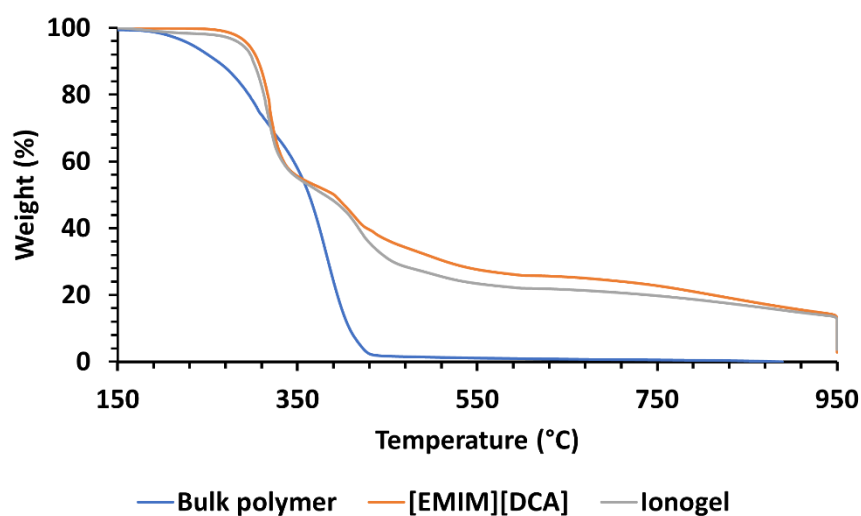

**Figure S59.** Thermogravimetric analysis (TGA) data obtained for bulk PHEMA<sub>30</sub>-*b*-PBzMA<sub>300</sub> block copolymer (blue), pure [EMIM][DCA] (orange), and 15% w/w PHEMA<sub>30</sub>-*b*-PBzMA<sub>291</sub> worm ionogel (grey).

## References

1. J. Ilavsky and P. R. Jemian, *J. Appl. Crystallogr*, 2009, **42**, 347-353.
2. J. Pedersen, *J. Appl. Crystallogr*, 2000, **33**, 637-640.
3. J. S. Pedersen and M. C. Gerstenberg, *Colloids Surfaces A Physicochem. Eng. Asp.*, 2003, **213**, 175-187.
4. J. S. Pedersen, C. Svaneborg, K. Almdal, I. W. Hamley and R. N. Young, *Macromolecules*, 2003, **36**, 416-433.
5. L. J. Fetters, D. J. Lohsey and R. H. Colby, *Physical Properties of Polymers Handbook*, Springer, New York, 2nd edn., 2007.
6. J. S. Pedersen and P. Schurtenberger, *Macromolecules*, 1996, **29**, 7602-7612.
7. J. Bang, S. Jain, Z. Li, T. P. Lodge, J. S. Pedersen, E. Kesselman and Y. Talmon, *Macromolecules*, 2006, **39**, 1199-1208.
8. B. Hammouda, *Probing Nanoscale Structures – The SANS Toolbox*, 2008.
